# Supplementary material for: A few key species drive community thermophilization under experimental warming
Source: Research Square preprint supplement (doi:10.21203/rs.3.rs-8050401/v1), 2025-11-18
Supplement: Supplementary file 1 [file 615f558d76dd9e72770d4be0.docx]

**Table S1.** Species that were present in >1 warming experiment. The two B4WarmED experiments contain the same species by design and are therefore not shown in this table.

| **Species** | **Experiments present in** |
| --- | --- |
| *Achillea millefolium* | Oklahoma, TeRaCON |
| *Andropogon gerardii* | Oklahoma, TeRaCON |
| *Bouteloua gracilis* | PHACE, TeRaCON |
| *Plantago patagonica* | PHACE, Oklahoma |
| *Schizachyrium scoparium* | Oklahoma, TeRaCON |
| *Solidago rigida* | Oklahoma, TeRaCON |
| *Sorghastrum nutans* | Oklahoma, TeRaCON |

**Table S2.** Linear model output testing for an effect of year on ΔCTI for each experiment. The intercept represents the predicted ΔCTI in the first year of the experiment.

| **Experiment** | **Predictor** | **Estimate** | **Std. Error** | **T-Value** | **P-Value** |
| --- | --- | --- | --- | --- | --- |
| JRGCE | Intercept  Year | -0.088  0.020 | 0.042  0.005 | -2.10  4.25 | 0.06  **<0.001** |
| PHACE | Intercept  Year | -0.104  0.057 | 0.071  0.020 | -1.46  2.91 | 0.20  **0.033** |
| TeRaCON | Intercept  Year | 0.114  -0.004 | 0.020  0.003 | 5.62  -1.20 | **<0.001**  0.26 |
| Oklahoma | Intercept  Year | -0.063  0.013 | 0.085  0.011 | -0.74  1.12 | 0.48  0.29 |
| B4WarmED CFC 3.1 | Intercept  Year | 0.027  0.022 | 0.062  0.009 | 0.444  2.49 | 0.67  **0.030** |
| B4WarmED CFC 1.6 | Intercept  Year | 0.055  0.004 | 0.044  0.006 | 1.24  0.71 | 0.24  0.49 |
| B4WarmED HWRC 3.1 | Intercept  Year | -0.008  0.017 | 0.018  0.003 | -0.43  6.79 | 0.67  **<0.001** |
| B4WarmED HWRC 1.6 | Intercept  Year | -0.015  0.011 | 0.023  0.003 | -0.65  3.24 | 0.53  **0.008** |

**Table S3.** All species contributions to the change in CTI in each experiment. Species contributions are ordered by the highest absolute species contribution to the lowest. The species temperature anomaly * the species abundance change = the species contribution. The slope of the warming effect on CTI over time is also given for each experiment (this slope matches those shown in Fig. 1g-l; for the B4WarmED experiments, the slope of the “warmed” treatment is given). The sum of all species contributions’ in each experiment equals the slope.

| **Experiment** | **Species** | **Species contribution** | **Species temperature anomaly** | **Species abundance change** | **Slope of warming effect on CTI** |
| --- | --- | --- | --- | --- | --- |
| B4Warmed CFC | *Pinus banksiana* | 0.0041 | -2.0988 | -0.0020 | 0.0217 |
| B4Warmed CFC | *Picea glauca* | 0.0040 | -1.9988 | -0.0020 |  |
| B4Warmed CFC | *Abies balsamea* | 0.0037 | -1.9988 | -0.0019 |  |
| B4Warmed CFC | *Acer saccharum* | 0.0028 | 1.5012 | 0.0019 |  |
| B4Warmed CFC | *Frangula alnus* | 0.0023 | 2.0012 | 0.0012 |  |
| B4Warmed CFC | *Lonicera morrowii* | 0.0014 | 2.1012 | 0.0007 |  |
| B4Warmed CFC | *Betula papyrifera* | -0.0014 | -1.5988 | 0.0009 |  |
| B4Warmed CFC | *Rhamnus cathartica* | 0.0013 | 1.3012 | 0.0010 |  |
| B4Warmed CFC | *Acer rubrum* | 0.0012 | 1.0012 | 0.0012 |  |
| B4Warmed CFC | *Quercus rubra* | 0.0011 | 1.3012 | 0.0009 |  |
| B4Warmed CFC | *Quercus macrocarpa* | 0.0010 | 1.5012 | 0.0006 |  |
| B4Warmed CFC | *Pinus strobus* | -0.0007 | 0.5012 | -0.0014 |  |
| B4Warmed CFC | *Populus tremouloides* | 0.0007 | -0.6988 | -0.0010 |  |
| B4Warmed CFC | *Lonicera tatarica* | 0.0001 | 1.2012 | 0.0001 |  |
| B4Warmed CFC | *Betula alleghaniensis* | 0.0000 | -0.6988 | 0.0000 |  |
| B4Warmed CFC | *Pinus resinosa* | 0.0000 | -1.0988 | 0.0000 |  |
| B4Warmed CFC | *Thuja occidentalis* | 0.0000 | -0.7988 | 0.0000 |  |
| B4Warmed HWRC | *Pinus banksiana* | 0.0053 | -2.0729 | -0.0026 | 0.0171 |
| B4Warmed HWRC | *Acer saccharum* | 0.0042 | 1.1271 | 0.0037 |  |
| B4Warmed HWRC | *Picea glauca* | 0.0040 | -1.7729 | -0.0023 |  |
| B4Warmed HWRC | *Quercus macrocarpa* | 0.0030 | 1.2271 | 0.0024 |  |
| B4Warmed HWRC | *Frangula alnus* | -0.0020 | 2.0271 | -0.0010 |  |
| B4Warmed HWRC | *Quercus rubra* | 0.0013 | 1.1271 | 0.0011 |  |
| B4Warmed HWRC | *Abies balsamea* | 0.0010 | -1.8729 | -0.0005 |  |
| B4Warmed HWRC | *Lonicera tatarica* | 0.0008 | 1.2271 | 0.0006 |  |
| B4Warmed HWRC | *Pinus strobus* | -0.0007 | 0.7271 | -0.0010 |  |
| B4Warmed HWRC | *Lonicera morrowii* | -0.0005 | 2.1271 | -0.0002 |  |
| B4Warmed HWRC | *Betula papyrifera* | 0.0004 | -1.4729 | -0.0003 |  |
| B4Warmed HWRC | *Acer rubrum* | 0.0002 | 0.9271 | 0.0002 |  |
| B4Warmed HWRC | *Populus tremouloides* | 0.0001 | -0.3729 | -0.0002 |  |
| B4Warmed HWRC | *Pinus resinosa* | 0.0000 | -0.7729 | 0.0000 |  |
| B4Warmed HWRC | *Rhamnus cathartica* | 0.0000 | 1.2271 | 0.0000 |  |
| B4Warmed HWRC | *Betula alleghaniensis* | 0.0000 | -0.1729 | 0.0000 |  |
| B4Warmed HWRC | *Thuja occidentalis* | 0.0000 | -0.4729 | 0.0000 |  |
| JRGCE | *Brachypodium distachyon* | 0.0054 | 0.8099 | 0.0067 | 0.0204 |
| JRGCE | *Trifolium dubium* | 0.0036 | -2.6901 | -0.0014 |  |
| JRGCE | *Geranium dissectum* | 0.0034 | -1.2901 | -0.0027 |  |
| JRGCE | *Festuca bromoides* | 0.0031 | -1.1901 | -0.0026 |  |
| JRGCE | *Bromus hordeaceus* | 0.0029 | -0.4901 | -0.0059 |  |
| JRGCE | *Elymus glaucus* | -0.0023 | -3.6901 | 0.0006 |  |
| JRGCE | *Danthonia californica* | 0.0022 | -4.6901 | -0.0005 |  |
| JRGCE | *Rumex acetosella* | -0.0021 | -3.9901 | 0.0005 |  |
| JRGCE | *Crepis vesicaria* | 0.0013 | -1.7901 | -0.0007 |  |
| JRGCE | *Stipa pulchra* | 0.0008 | 0.6099 | 0.0013 |  |
| JRGCE | *Dipsacus sativus* | -0.0007 | -1.3901 | 0.0005 |  |
| JRGCE | *Torilis arvensis* | 0.0006 | -1.1901 | -0.0005 |  |
| JRGCE | *Avena barbata* | 0.0006 | 0.3099 | 0.0018 |  |
| JRGCE | *Gastridium phleoides* | 0.0005 | 0.3099 | 0.0016 |  |
| JRGCE | *Convolvulus arvensis* | 0.0005 | -1.8901 | -0.0003 |  |
| JRGCE | *Aira caryophyllea* | 0.0003 | -2.2901 | -0.0001 |  |
| JRGCE | *Avena fatua* | 0.0003 | 0.5099 | 0.0006 |  |
| JRGCE | *Sisyrinchium bellum* | 0.0003 | -1.1901 | -0.0003 |  |
| JRGCE | *Briza maxima* | 0.0003 | -2.2901 | -0.0001 |  |
| JRGCE | *Briza minor* | 0.0003 | -1.2901 | -0.0002 |  |
| JRGCE | *Bromus diandrus* | -0.0002 | 0.2099 | -0.0011 |  |
| JRGCE | *Vicia sativa* | -0.0002 | -1.6901 | 0.0001 |  |
| JRGCE | *Epilobium brachycarpum* | -0.0002 | -4.0901 | 0.0001 |  |
| JRGCE | *Lysimachia arvensis* | -0.0002 | -0.1901 | 0.0010 |  |
| JRGCE | *Hemizonia congesta* | 0.0002 | -1.3901 | -0.0001 |  |
| JRGCE | *Festuca perennis* | -0.0002 | 0.7099 | -0.0003 |  |
| JRGCE | *Acmispon americanus* | 0.0002 | -1.3901 | -0.0001 |  |
| JRGCE | *Taraxia ovata* | -0.0002 | -2.0901 | 0.0001 |  |
| JRGCE | *Phalaris aquatica* | 0.0001 | -1.0901 | -0.0001 |  |
| JRGCE | *Logfia gallica* | 0.0001 | 0.4099 | 0.0003 |  |
| JRGCE | *Vicia tetrasperma* | -0.0001 | -3.7901 | 0.0000 |  |
| JRGCE | *Rumex crispus* | -0.0001 | -1.3901 | 0.0000 |  |
| JRGCE | *Carduus pycnocephalus* | -0.0001 | -0.4901 | 0.0001 |  |
| JRGCE | *Zeltnera davyi* | -0.0001 | -1.6901 | 0.0000 |  |
| JRGCE | *Trifolium hirtum* | 0.0000 | -0.8901 | 0.0001 |  |
| JRGCE | *Lythrum hyssopifolia* | 0.0000 | 0.1099 | 0.0004 |  |
| JRGCE | *Lactuca serriola* | 0.0000 | -0.1901 | -0.0002 |  |
| JRGCE | *Juncus bufonius* | 0.0000 | -1.1901 | 0.0000 |  |
| JRGCE | *Hypochaeris glabra* | 0.0000 | 0.3099 | -0.0001 |  |
| JRGCE | *Centaurea solstitialis* | 0.0000 | -1.1901 | 0.0000 |  |
| JRGCE | *Medicago polymorpha* | 0.0000 | 0.6599 | 0.0000 |  |
| JRGCE | *Genista monspessulana* | 0.0000 | -2.1901 | 0.0000 |  |
| JRGCE | *Baccharis pilularis* | 0.0000 | -0.8901 | 0.0000 |  |
| JRGCE | *Kickxia spuria* | 0.0000 | -0.5401 | 0.0000 |  |
| JRGCE | *Madia gracilis* | 0.0000 | -2.6901 | 0.0000 |  |
| JRGCE | *Erigeron canadensis* | 0.0000 | -0.6901 | 0.0000 |  |
| JRGCE | *Erodium botrys* | 0.0000 | 0.0099 | 0.0009 |  |
| JRGCE | *Urospermum picroides* | 0.0000 | -0.8401 | 0.0000 |  |
| JRGCE | *Pistacia atlantica* | 0.0000 | 1.0099 | 0.0000 |  |
| JRGCE | *Sonchus asper* | 0.0000 | 0.0099 | 0.0002 |  |
| JRGCE | *Quercus agrifolia* | 0.0000 | -0.3901 | 0.0000 |  |
| JRGCE | *Erodium cicutarium* | 0.0000 | -0.1901 | 0.0000 |  |
| JRGCE | *Toxicodendron diversilobum* | 0.0000 | -1.2901 | 0.0000 |  |
| JRGCE | *Pseudognaphalium californicum* | 0.0000 | 0.4099 | 0.0000 |  |
| JRGCE | *Helminthotheca echioides* | 0.0000 | 0.0099 | 0.0000 |  |
| JRGCE | *Quercus lobata* | 0.0000 | -0.1901 | 0.0000 |  |
| Oklahoma | *Bothriochloa ischaemum* | 0.0327 | 2.9888 | 0.0109 | 0.0125 |
| Oklahoma | *Sorghastrum nutans* | -0.0162 | -2.4112 | 0.0067 |  |
| Oklahoma | *Sporobolus compositus* | 0.0160 | -2.2112 | -0.0073 |  |
| Oklahoma | *Solidago rigida* | -0.0110 | -5.6112 | 0.0020 |  |
| Oklahoma | *Symphyotrichum ericoides* | -0.0084 | -1.9112 | 0.0044 |  |
| Oklahoma | *Andropogon gerardii* | 0.0054 | -3.2112 | -0.0017 |  |
| Oklahoma | *Schizachyrium scoparium* | -0.0052 | 0.5888 | -0.0089 |  |
| Oklahoma | *Ambrosia psilostachya* | -0.0050 | 2.7888 | -0.0018 |  |
| Oklahoma | *Carex brevior* | 0.0044 | -3.8112 | -0.0012 |  |
| Oklahoma | *Dichanthelium oligosanthes* | -0.0035 | 1.8888 | -0.0019 |  |
| Oklahoma | *Dactylis glomerata* | 0.0031 | -5.8112 | -0.0005 |  |
| Oklahoma | *Dalea purpurea* | -0.0026 | -5.4112 | 0.0005 |  |
| Oklahoma | *Psoralidium tenuiflorum* | 0.0015 | -3.8112 | -0.0004 |  |
| Oklahoma | *Tridens flavus* | -0.0015 | 0.7888 | -0.0018 |  |
| Oklahoma | *Solidago drummondii* | -0.0012 | -2.3112 | 0.0005 |  |
| Oklahoma | *Sabatia campestris* | -0.0011 | 3.3888 | -0.0003 |  |
| Oklahoma | *Lithospermum caroliniense* | 0.0009 | -2.6112 | -0.0003 |  |
| Oklahoma | *Croton glandulosus* | 0.0009 | 1.9888 | 0.0004 |  |
| Oklahoma | *Diodia virginiana* | 0.0008 | 2.9888 | 0.0003 |  |
| Oklahoma | *Cornus drummondii* | 0.0006 | 2.4888 | 0.0002 |  |
| Oklahoma | *Salvia azurea* | -0.0006 | -0.8112 | 0.0007 |  |
| Oklahoma | *Panicum virgatum* | 0.0006 | -1.3112 | -0.0004 |  |
| Oklahoma | *Elymus canadensis* | 0.0005 | -3.9112 | -0.0001 |  |
| Oklahoma | *Sporobolus neglectus* | 0.0005 | -2.7112 | -0.0002 |  |
| Oklahoma | *Achillea millefolium* | 0.0005 | -5.9112 | -0.0001 |  |
| Oklahoma | *Solidago nemoralis* | 0.0005 | -2.3112 | -0.0002 |  |
| Oklahoma | *Symphyotrichum ontarionsis* | -0.0005 | -3.0112 | 0.0002 |  |
| Oklahoma | *Muhlenbergia capillaris* | 0.0005 | 3.4888 | 0.0001 |  |
| Oklahoma | *Buglossoides arvensis* | 0.0005 | 2.3888 | 0.0002 |  |
| Oklahoma | *Ratibida columnifera* | 0.0004 | 2.4888 | 0.0002 |  |
| Oklahoma | *Dianthus armeria* | -0.0004 | -3.4112 | 0.0001 |  |
| Oklahoma | *Solanum carolinense* | 0.0004 | -1.6112 | -0.0003 |  |
| Oklahoma | *Dalea candida* | 0.0004 | -4.0112 | -0.0001 |  |
| Oklahoma | *Lithospermum incisum* | -0.0004 | -1.7112 | 0.0002 |  |
| Oklahoma | *Calylophus serrulatus* | 0.0004 | -2.9112 | -0.0001 |  |
| Oklahoma | *Prunus angustifolia* | -0.0004 | 2.1888 | -0.0002 |  |
| Oklahoma | *Galium virgatum* | -0.0004 | 2.8888 | -0.0001 |  |
| Oklahoma | *Scutellaria parvula* | 0.0004 | -1.9112 | -0.0002 |  |
| Oklahoma | *Aristida purpurascens* | -0.0004 | 1.6388 | -0.0002 |  |
| Oklahoma | *Bothriochloa saccharoides* | 0.0004 | 1.0888 | 0.0003 |  |
| Oklahoma | *Hedyotis nigricans* | -0.0004 | 2.6888 | -0.0001 |  |
| Oklahoma | *Panicum capillare* | 0.0004 | -3.0112 | -0.0001 |  |
| Oklahoma | *Amphiachyris dracunculoides* | -0.0003 | 0.2888 | -0.0012 |  |
| Oklahoma | *Buchnera americana* | -0.0003 | -1.3112 | 0.0003 |  |
| Oklahoma | *Diodia teres* | -0.0003 | 1.4888 | -0.0002 |  |
| Oklahoma | *Croton punctatus* | 0.0003 | 6.0388 | 0.0000 |  |
| Oklahoma | *Mimosa nuttallii* | 0.0002 | 0.2888 | 0.0008 |  |
| Oklahoma | *Viola bicolor* | -0.0002 | -2.7112 | 0.0001 |  |
| Oklahoma | *Mimosa rupertiana* | -0.0002 | 1.2888 | -0.0002 |  |
| Oklahoma | *Antennaria neglecta* | 0.0002 | -4.5112 | 0.0000 |  |
| Oklahoma | *Eragrostis curvula* | 0.0002 | -0.5612 | -0.0004 |  |
| Oklahoma | *Aristida oligantha* | -0.0002 | -1.2112 | 0.0002 |  |
| Oklahoma | *Coreopsis tinctoria* | -0.0002 | 2.0888 | -0.0001 |  |
| Oklahoma | *Scleria ciliata* | -0.0002 | 2.1888 | -0.0001 |  |
| Oklahoma | *Eragrostis trichodes* | -0.0002 | -2.6112 | 0.0001 |  |
| Oklahoma | *Cirsium altissimum* | 0.0002 | -2.2112 | -0.0001 |  |
| Oklahoma | *Linum sulcatum* | 0.0002 | -2.7112 | -0.0001 |  |
| Oklahoma | *Ruellia humilis* | -0.0002 | -1.2112 | 0.0001 |  |
| Oklahoma | *Euphorbia dentata* | -0.0002 | 2.5888 | -0.0001 |  |
| Oklahoma | *Asclepias viridis* | 0.0001 | 2.4888 | 0.0001 |  |
| Oklahoma | *Stenaria nigricans* | 0.0001 | 2.5888 | 0.0001 |  |
| Oklahoma | *Stenosiphon linifolius* | -0.0001 | -0.7112 | 0.0002 |  |
| Oklahoma | *Desmanthus illinoensis* | -0.0001 | -0.1112 | 0.0012 |  |
| Oklahoma | *Hedeoma hispida* | 0.0001 | -1.6112 | -0.0001 |  |
| Oklahoma | *Grindelia papposa* | 0.0001 | 2.3888 | 0.0000 |  |
| Oklahoma | *Erigeron strigosus* | -0.0001 | -0.3112 | 0.0004 |  |
| Oklahoma | *Haplopappus ciliatus* | -0.0001 | 1.9888 | -0.0001 |  |
| Oklahoma | *Plantago patagonica* | 0.0001 | -3.9112 | 0.0000 |  |
| Oklahoma | *Elymus elymoides* | 0.0001 | -7.2612 | 0.0000 |  |
| Oklahoma | *Setaria parviflora* | -0.0001 | 2.7888 | 0.0000 |  |
| Oklahoma | *Pyrrhopappus grandiflorus* | -0.0001 | -0.6112 | 0.0002 |  |
| Oklahoma | *Diodia ocymifolia* | -0.0001 | -4.4112 | 0.0000 |  |
| Oklahoma | *Andropogon ternarius* | 0.0001 | 2.2888 | 0.0000 |  |
| Oklahoma | *Ruellia hirta* | 0.0001 | -0.6112 | -0.0001 |  |
| Oklahoma | *Chamaecrista fasciculata* | -0.0001 | 0.2888 | -0.0003 |  |
| Oklahoma | *Solidago canadensis* | 0.0001 | -5.7112 | 0.0000 |  |
| Oklahoma | *Apocynum cannabinum* | 0.0001 | -3.5112 | 0.0000 |  |
| Oklahoma | *Conyza canadensis* | -0.0001 | -3.0112 | 0.0000 |  |
| Oklahoma | *Stipa tenuissima* | -0.0001 | -0.6612 | 0.0001 |  |
| Oklahoma | *Croton monanthogynus* | -0.0001 | 2.7888 | 0.0000 |  |
| Oklahoma | *Ulmus rubra* | 0.0001 | -2.3112 | 0.0000 |  |
| Oklahoma | *Solidago ludiviciana* | 0.0001 | 2.6388 | 0.0000 |  |
| Oklahoma | *Melilotus alba* | 0.0001 | -7.1112 | 0.0000 |  |
| Oklahoma | *Solanum elaeagnifolium* | 0.0001 | 2.7888 | 0.0000 |  |
| Oklahoma | *Erodium texanum* | -0.0001 | 3.2888 | 0.0000 |  |
| Oklahoma | *Tragia betonicifolia* | 0.0001 | -1.3112 | 0.0000 |  |
| Oklahoma | *Sideroxylon lanuginosum* | 0.0001 | 3.0888 | 0.0000 |  |
| Oklahoma | *Chaerophyllum tainturieri* | 0.0000 | 2.6888 | 0.0000 |  |
| Oklahoma | *Liatris squarrosa* | 0.0000 | 1.0888 | 0.0000 |  |
| Oklahoma | *Gaura parviflora* | 0.0000 | 0.8388 | 0.0000 |  |
| Oklahoma | *Grindelia ciliata* | 0.0000 | 0.6388 | -0.0001 |  |
| Oklahoma | *Euphorbia hexagona* | 0.0000 | -3.1112 | 0.0000 |  |
| Oklahoma | *Bouteloua curtipendula* | 0.0000 | -1.2112 | 0.0000 |  |
| Oklahoma | *Anemone berlandieri* | 0.0000 | 3.3888 | 0.0000 |  |
| Oklahoma | *Heterotheca latifolia* | 0.0000 | 2.4888 | 0.0000 |  |
| Oklahoma | *Juncus marginatus* | 0.0000 | 2.0888 | 0.0000 |  |
| Oklahoma | *Sorghum halepense* | 0.0000 | 2.7888 | 0.0000 |  |
| Oklahoma | *Plantago virginica* | 0.0000 | 0.8888 | 0.0000 |  |
| Oklahoma | *Gaillardia aestivalis* | 0.0000 | 2.9888 | 0.0000 |  |
| Oklahoma | *Cyperus sp* | 0.0000 | 0.9888 | 0.0000 |  |
| Oklahoma | *Setaria glauca* | 0.0000 | -0.9612 | 0.0000 |  |
| Oklahoma | *Trifolium repens* | 0.0000 | -0.9112 | 0.0000 |  |
| Oklahoma | *Bromus japonicus* | 0.0000 | -1.5112 | 0.0000 |  |
| Oklahoma | *Lespedeza stuevei* | 0.0000 | 1.4888 | 0.0000 |  |
| Oklahoma | *Polygala alba* | 0.0000 | -1.5112 | 0.0000 |  |
| Oklahoma | *Coreopsis grandiflora* | 0.0000 | 0.0888 | 0.0001 |  |
| Oklahoma | *Cercis canadensis* | 0.0000 | 0.4888 | 0.0000 |  |
| Oklahoma | *Hieracium longipilum* | 0.0000 | -2.8112 | 0.0000 |  |
| Oklahoma | *Euphorbia glyptosperma* | 0.0000 | -4.1112 | 0.0000 |  |
| Oklahoma | *Celtis occidentalis* | 0.0000 | -4.4112 | 0.0000 |  |
| Oklahoma | *Polygala incarnata* | 0.0000 | -0.3612 | 0.0000 |  |
| Oklahoma | *Rosa spinosissima* | 0.0000 | -3.0112 | 0.0000 |  |
| Oklahoma | *Lespedeza hirta* | 0.0000 | -0.2112 | 0.0000 |  |
| Oklahoma | *Rhus copallina* | 0.0000 | 0.7888 | 0.0000 |  |
| Oklahoma | *Cynodon dactylon* | 0.0000 | 2.9888 | 0.0000 |  |
| Oklahoma | *Prunus gracilis* | 0.0000 | 2.3888 | 0.0000 |  |
| Oklahoma | *Sisyrinchium angustifolium* | 0.0000 | -0.2112 | 0.0000 |  |
| Oklahoma | *Eleocharis sp* | 0.0000 | -0.8112 | 0.0000 |  |
| Oklahoma | *Desmodium paniculatum* | 0.0000 | 0.3888 | 0.0000 |  |
| Oklahoma | *Oxalis stricta* | 0.0000 | -2.9112 | 0.0000 |  |
| Oklahoma | *Oxalis corniculata* | 0.0000 | 2.6888 | 0.0000 |  |
| Oklahoma | *Juniperus virginiana* | 0.0000 | -0.0112 | 0.0000 |  |
| Oklahoma | *Ambrosia trida* | 0.0000 | -0.0112 | 0.0000 |  |
| PHACE | *Artemisia frigida* | 0.0317 | -2.3650 | -0.0134 | 0.0573 |
| PHACE | *Carex duriuscula* | -0.0241 | -1.9650 | 0.0123 |  |
| PHACE | *Pascopyrum smithii* | 0.0141 | 0.4350 | 0.0323 |  |
| PHACE | *Heterotheca villosa* | 0.0113 | -1.7650 | -0.0064 |  |
| PHACE | *Koeleria macrantha* | 0.0071 | -1.5650 | -0.0045 |  |
| PHACE | *Hesperostipa comata* | 0.0064 | -0.4650 | -0.0137 |  |
| PHACE | *Vulpia octoflora* | 0.0056 | 4.6350 | 0.0012 |  |
| PHACE | *Bouteloua gracilis* | -0.0052 | 0.6350 | -0.0081 |  |
| PHACE | *Mertensia lanceolata* | 0.0045 | -3.5650 | -0.0013 |  |
| PHACE | *Erigeron pumilus* | 0.0044 | -1.0650 | -0.0041 |  |
| PHACE | *Plantago patagonica* | 0.0043 | 3.8350 | 0.0011 |  |
| PHACE | *Oenothera coronopifolia* | -0.0024 | -2.3650 | 0.0010 |  |
| PHACE | *Potentilla pensylvanica* | 0.0020 | -3.5650 | -0.0006 |  |
| PHACE | *Sphaeralcea coccinea* | 0.0019 | 0.5350 | 0.0035 |  |
| PHACE | *Astragalus sp* | -0.0018 | 0.8350 | -0.0021 |  |
| PHACE | *Machaeranthera pinnatifida* | 0.0017 | 4.5350 | 0.0004 |  |
| PHACE | *Cirsium undulatum* | -0.0015 | 1.6350 | -0.0009 |  |
| PHACE | *Salsola tragus* | -0.0014 | 3.6350 | -0.0004 |  |
| PHACE | *Linaria dalmatica* | -0.0007 | -0.3650 | 0.0018 |  |
| PHACE | *Oenothera suffrutescens* | -0.0005 | 1.8350 | -0.0003 |  |
| PHACE | *Lesquerella montana* | -0.0005 | -2.0650 | 0.0002 |  |
| PHACE | *Lepidium densiflorum* | 0.0004 | 0.8350 | 0.0004 |  |
| PHACE | *Grindelia squarrosa* | -0.0003 | -0.3650 | 0.0009 |  |
| PHACE | *Lygodesmia juncea* | -0.0003 | -1.4650 | 0.0002 |  |
| PHACE | *Tragopogon pratensis* | 0.0001 | -1.4650 | -0.0001 |  |
| PHACE | *Mirabilis linearis* | 0.0001 | 2.1350 | 0.0001 |  |
| PHACE | *Eriogonum effusum* | 0.0001 | 0.5350 | 0.0002 |  |
| PHACE | *Escobaria vivipara* | 0.0001 | 1.5350 | 0.0000 |  |
| PHACE | *Allium textile* | 0.0001 | -1.2650 | -0.0001 |  |
| PHACE | *Centaurea diffusa* | 0.0001 | -0.3650 | -0.0002 |  |
| PHACE | *Phlox hoodii* | -0.0001 | -2.1650 | 0.0000 |  |
| PHACE | *Antennaria rosea* | 0.0000 | -5.5650 | 0.0000 |  |
| PHACE | *Tetraneuris acaulis* | 0.0000 | -0.5650 | 0.0001 |  |
| PHACE | *Lappula occidentalis* | 0.0000 | 1.5350 | 0.0000 |  |
| PHACE | *Leucocrinum montanum* | 0.0000 | -0.8650 | 0.0000 |  |
| PHACE | *Liatris punctata* | 0.0000 | 0.3350 | -0.0001 |  |
| PHACE | *Penstemon albidus* | 0.0000 | 0.3350 | 0.0001 |  |
| PHACE | *Musineon divaricatum* | 0.0000 | -1.2650 | 0.0000 |  |
| PHACE | *Erysimum asperum* | 0.0000 | -0.0650 | 0.0003 |  |
| PHACE | *Comandra umbellata* | 0.0000 | -0.8650 | 0.0000 |  |
| PHACE | *Artemisia dracunculus* | 0.0000 | 0.0350 | 0.0001 |  |
| PHACE | *Chenopodium leptophyllum* | 0.0000 | 0.8350 | 0.0000 |  |
| PHACE | *Descurainia sophia* | 0.0000 | 1.1350 | 0.0000 |  |
| PHACE | *Poa secunda* | 0.0000 | -2.5650 | 0.0000 |  |
| PHACE | *Draba reptans* | 0.0000 | -0.2650 | 0.0000 |  |
| PHACE | *Cryptantha thyrsiflora* | 0.0000 | 0.2350 | 0.0000 |  |
| PHACE | *Sisymbrium altissimum* | 0.0000 | 0.6350 | 0.0000 |  |
| PHACE | *Bouteloua dactyloides* | 0.0000 | 4.8350 | 0.0000 |  |
| PHACE | *Cryptantha cinerea* | 0.0000 | 2.1350 | 0.0000 |  |
| PHACE | *Delphinium geyeri* | 0.0000 | -1.3650 | 0.0000 |  |
| PHACE | *Descurainia pinnata* | 0.0000 | 5.3350 | 0.0000 |  |
| PHACE | *Eriogonum alatum* | 0.0000 | 0.2350 | 0.0000 |  |
| PHACE | *Machaeranthera canescens* | 0.0000 | -1.0650 | 0.0000 |  |
| PHACE | *Picradeniopsis oppositifolia* | 0.0000 | 0.6350 | 0.0000 |  |
| TeRaCON | *Sorghastrum nutans* | -0.0068 | 1.0405 | -0.0066 | -0.0037 |
| TeRaCON | *Asclepias tuberosa* | 0.0041 | 1.3405 | 0.0030 |  |
| TeRaCON | *Andropogon gerardii* | 0.0028 | 0.2405 | 0.0117 |  |
| TeRaCON | *Lespedeza capitata* | -0.0018 | 0.6405 | -0.0028 |  |
| TeRaCON | *Bouteloua gracilis* | -0.0014 | -0.4595 | 0.0030 |  |
| TeRaCON | *Poa pratensis* | -0.0011 | -0.3595 | 0.0030 |  |
| TeRaCON | *Lupinus perennis* | 0.0010 | -0.4595 | -0.0023 |  |
| TeRaCON | *Schizachyrium scoparium* | -0.0008 | 0.1405 | -0.0056 |  |
| TeRaCON | *Achillea millefolium* | 0.0006 | -0.8595 | -0.0007 |  |
| TeRaCON | *Petalostemum villosum* | -0.0005 | -0.3595 | 0.0013 |  |
| TeRaCON | *Koeleria cristata* | 0.0003 | -0.7595 | -0.0004 |  |
| TeRaCON | *Solidago rigida* | -0.0002 | 0.0405 | -0.0042 |  |
| TeRaCON | *Agropyron repens* | 0.0002 | 0.1405 | 0.0012 |  |
| TeRaCON | *Amorpha canescens* | -0.0001 | 0.1405 | -0.0008 |  |
| TeRaCON | *Bromus inermis* | -0.0001 | -0.5595 | 0.0002 |  |
| TeRaCON | *Anemone cylindrica* | 0.0000 | -1.5595 | 0.0000 |  |

**Table S4.** Linear model outputs testing for a relationship between log(mean trait value) and species contributions, abundance shifts, and temperature anomalies for all plant traits. The adjusted p-value was calculated using BH correction.

| **Response** | **Trait** | **Estimate** | **Std. Error** | **T-Value** | **P-Value** | **P-Value (adj)** |
| --- | --- | --- | --- | --- | --- | --- |
| Species contribution to β CTI | Seed dry mass  Seed length  Seed number per plant  Seed germination rate  Seed longevity  SLA  LDMC  Leaf thickness  Stem diameter  Plant height vegetative  Specific root length  Specific fine root length  Fine root length | -5.32e-5  1.87e-4  -5.75e-4  -4.92e-4  -4.88e-4  3.99e-4  6.37e-4  -4.28e-4  4.59e-4  6.24e-5  -3.07e-4  8.10e-4  3.27e-4 | 1.18e-4  2.85e-4  3.25e-4  1.72e-3  3.43e-4  8.07e-4  9.80e-4  5.84e-4  2.33e-4  2.15e-4  7.02e-4  6.31e-4  2.40e-4 | -0.45  0.66  -1.77  -0.29  -1.42  0.49  0.65  -0.73  1.97  0.29  -0.44  1.28  1.37 | 0.65  0.51  0.08  0.78  0.16  0.62  0.52  0.47  0.07  0.77  0.66  0.21  0.19 | 0.78  0.78  0.54  0.78  0.54  0.78  0.78  0.78  0.54  0.78  0.54  0.78  0.54 |
| Species β abundance | Seed dry mass  Seed length  Seed number per plant  Seed germination rate  Seed longevity  SLA  LDMC  Leaf thickness  Stem diameter  Plant height vegetative  Specific root length  Specific fine root length  Fine root length | 8.86e-5  -1.25e-4  -1.55e-4  7.82e-4  4.52e-4  5.17e-4  -1.44e-4  -7.82e-4  7.65e-5  4.94e-6  -7.38e-4  -3.24e-4  2.43e-4 | 6.67e-5  2.22e-4  1.50e-4  9.34e-4  2.10e-4  4.49e-4  5.47e-4  3.19e-4  1.78e-4  1.19e-4  6.00e-4  4.41e-4  2.05e-4 | 1.33  -0.56  -1.04  0.84  2.15  1.15  -0.26  -2.45  0.43  0.04  -1.23  -0.73  1.18 | 0.19  0.58  0.31  0.41  0.04  0.25  0.79  0.02  0.67  0.97  0.23  0.47  0.25 | 0.55  0.75  0.59  0.66  0.24  0.55  0.86  0.20  0.79  0.97  0.55  0.67  0.55 |
| Species temperature anomaly (°C) | Seed dry mass  Seed length  Seed number per plant  Seed germination rate  Seed longevity  SLA  LDMC  Leaf thickness  Stem diameter  Plant height vegetative  Specific root length  Specific fine root length  Fine root length | 0.21  0.51  -0.10  -0.24  0.62  0.43  -0.23  -0.49  0.59  0.12  -0.20  -0.38  0.43 | 0.07  0.32  0.15  0.86  0.29  0.37  0.46  0.24  0.17  0.11  0.43  0.29  0.21 | 3.17  1.61  -0.68  -0.28  2.10  1.17  -0.50  -2.02  3.54  1.05  -0.47  -1.32  2.09 | 0.002  0.11  0.50  0.78  0.04  0.24  0.62  0.05  0.001  0.30  0.64  0.19  0.06 | **0.01**  0.25  0.65  0.78  0.15  0.40  0.69  0.15  **0.01**  0.43  0.69  0.36  0.15 |


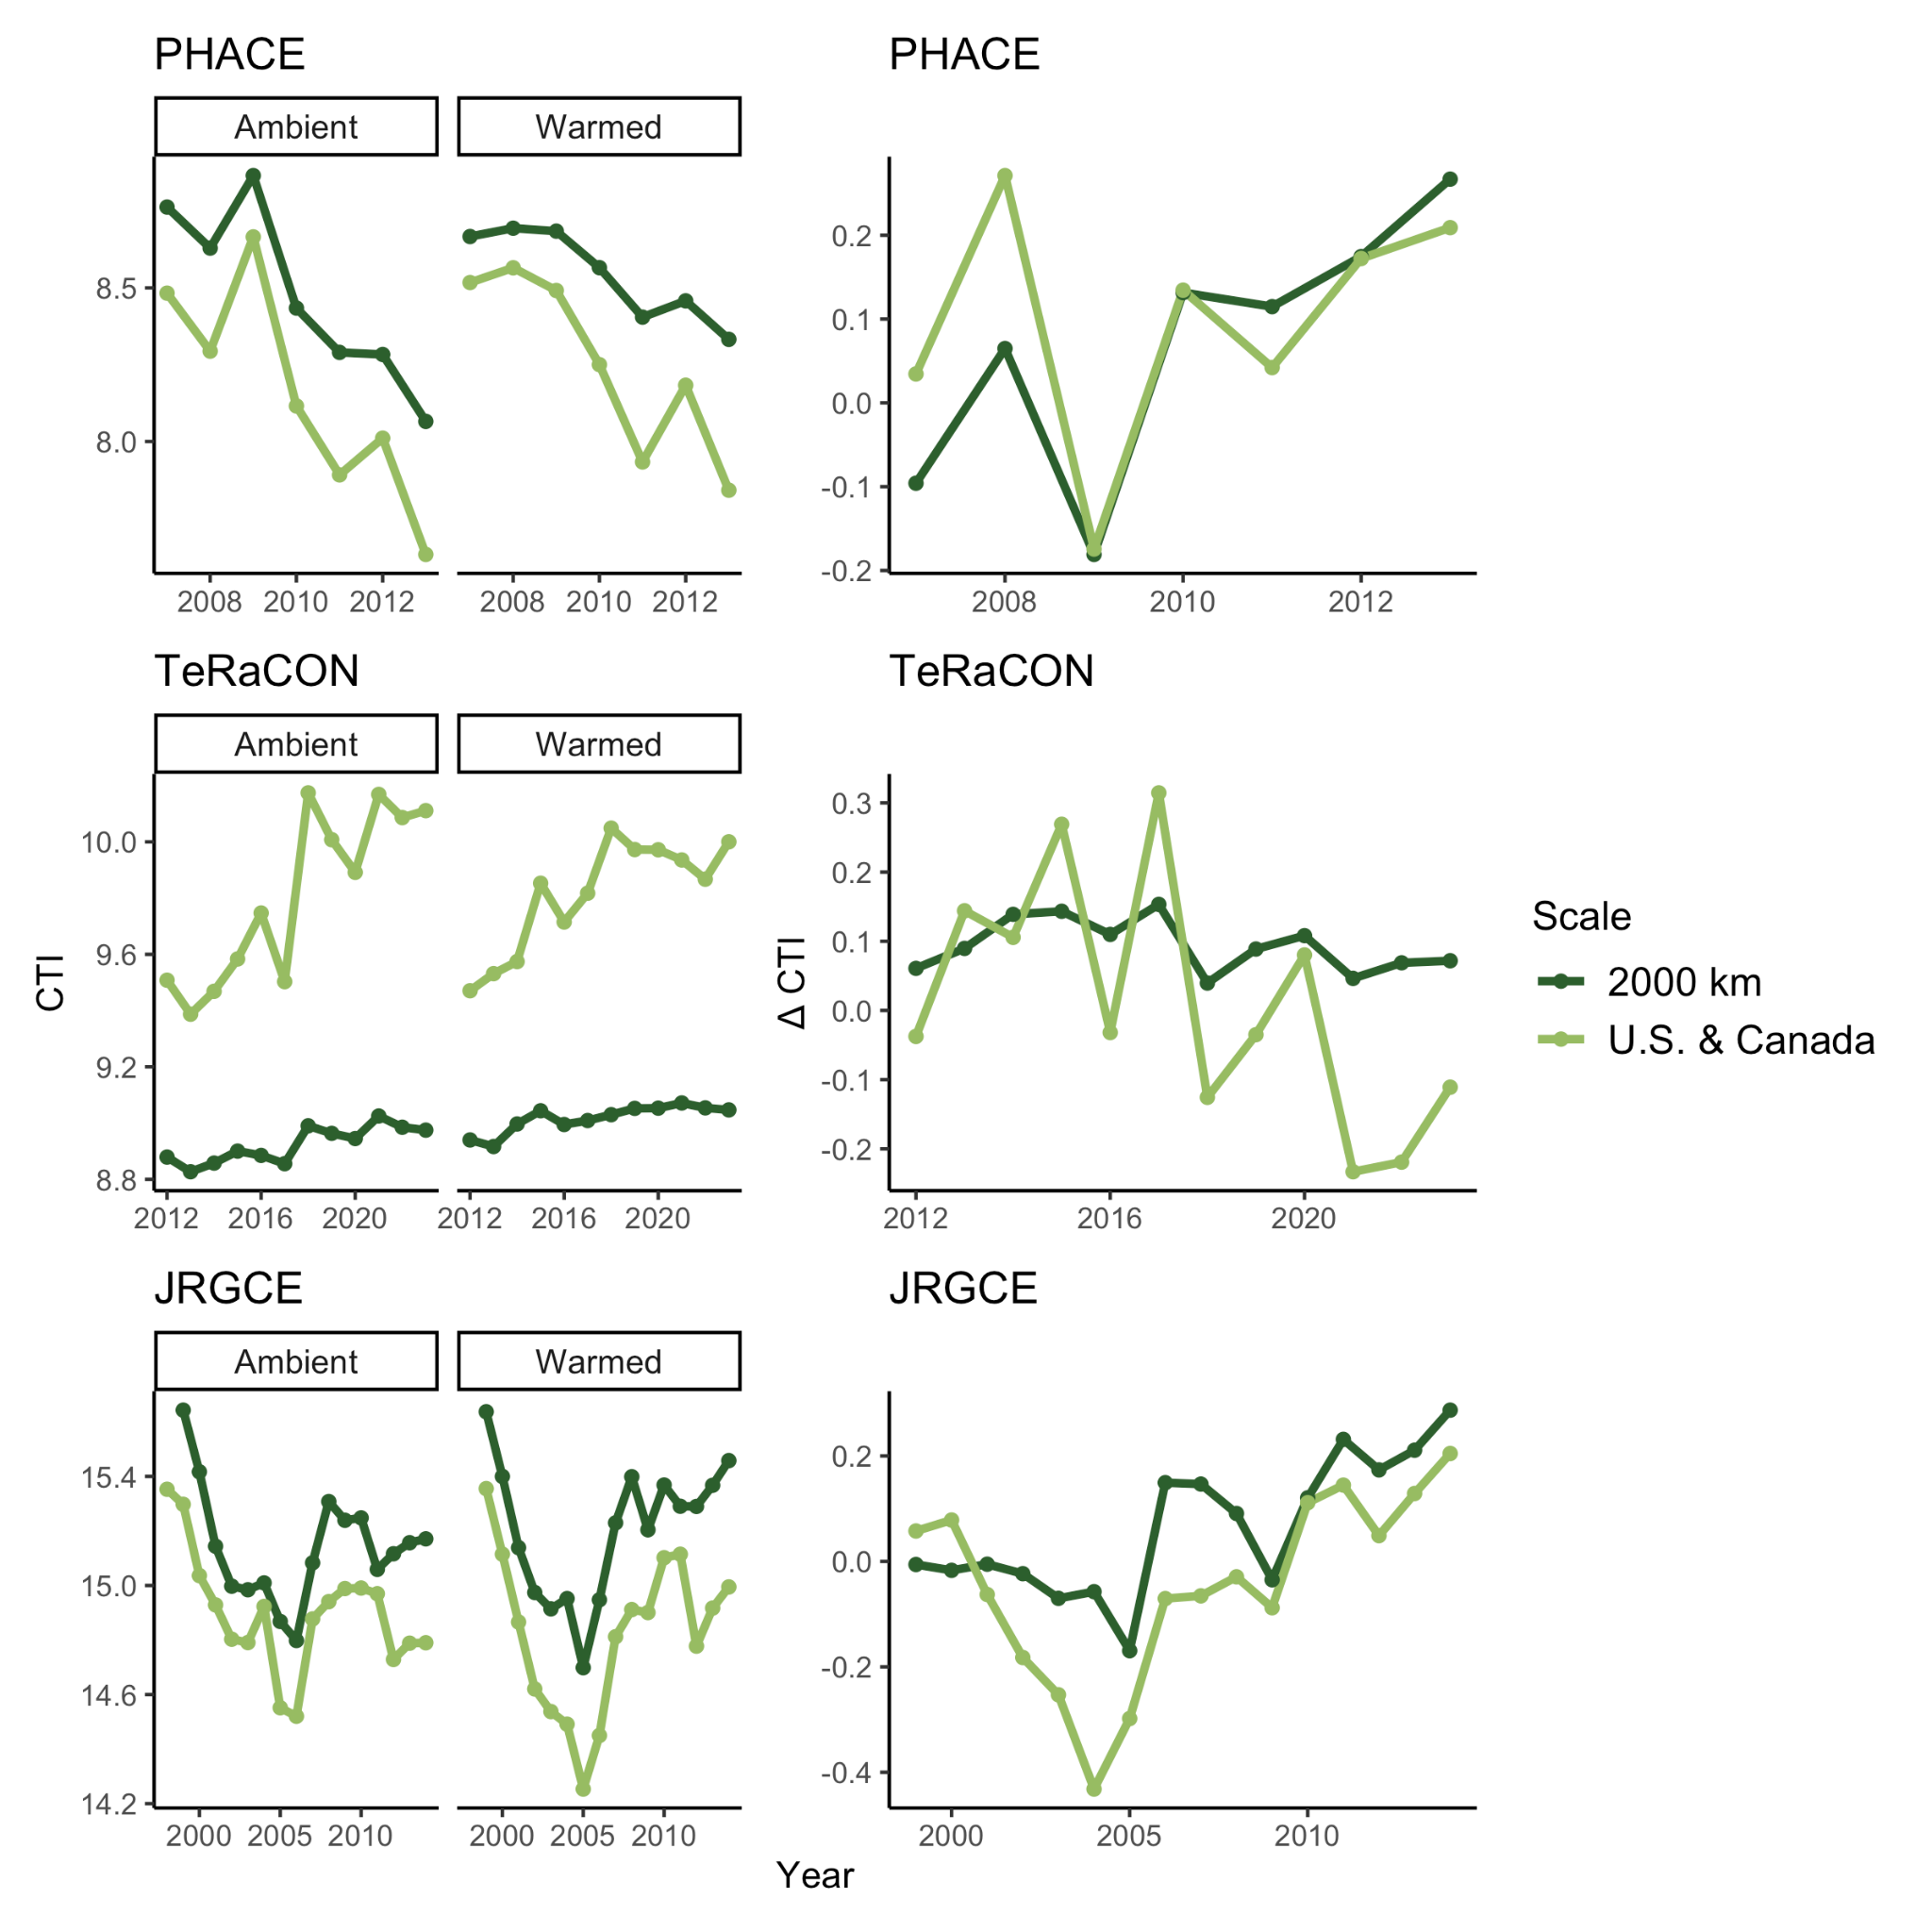


**Figure S1.** CTIs calculated using GBIF occurrence points in a 2,000 km x 2,000 km bounding box around each experiment’s location (dark green) and using all GBIF occurrence points in the U.S. and Canada (light green). The left column shows average CTI per scale, year, and treatment (ambient or warmed), and the right column shows the warming treatment effect on CTI each year (warmed CTI - ambient CTI).


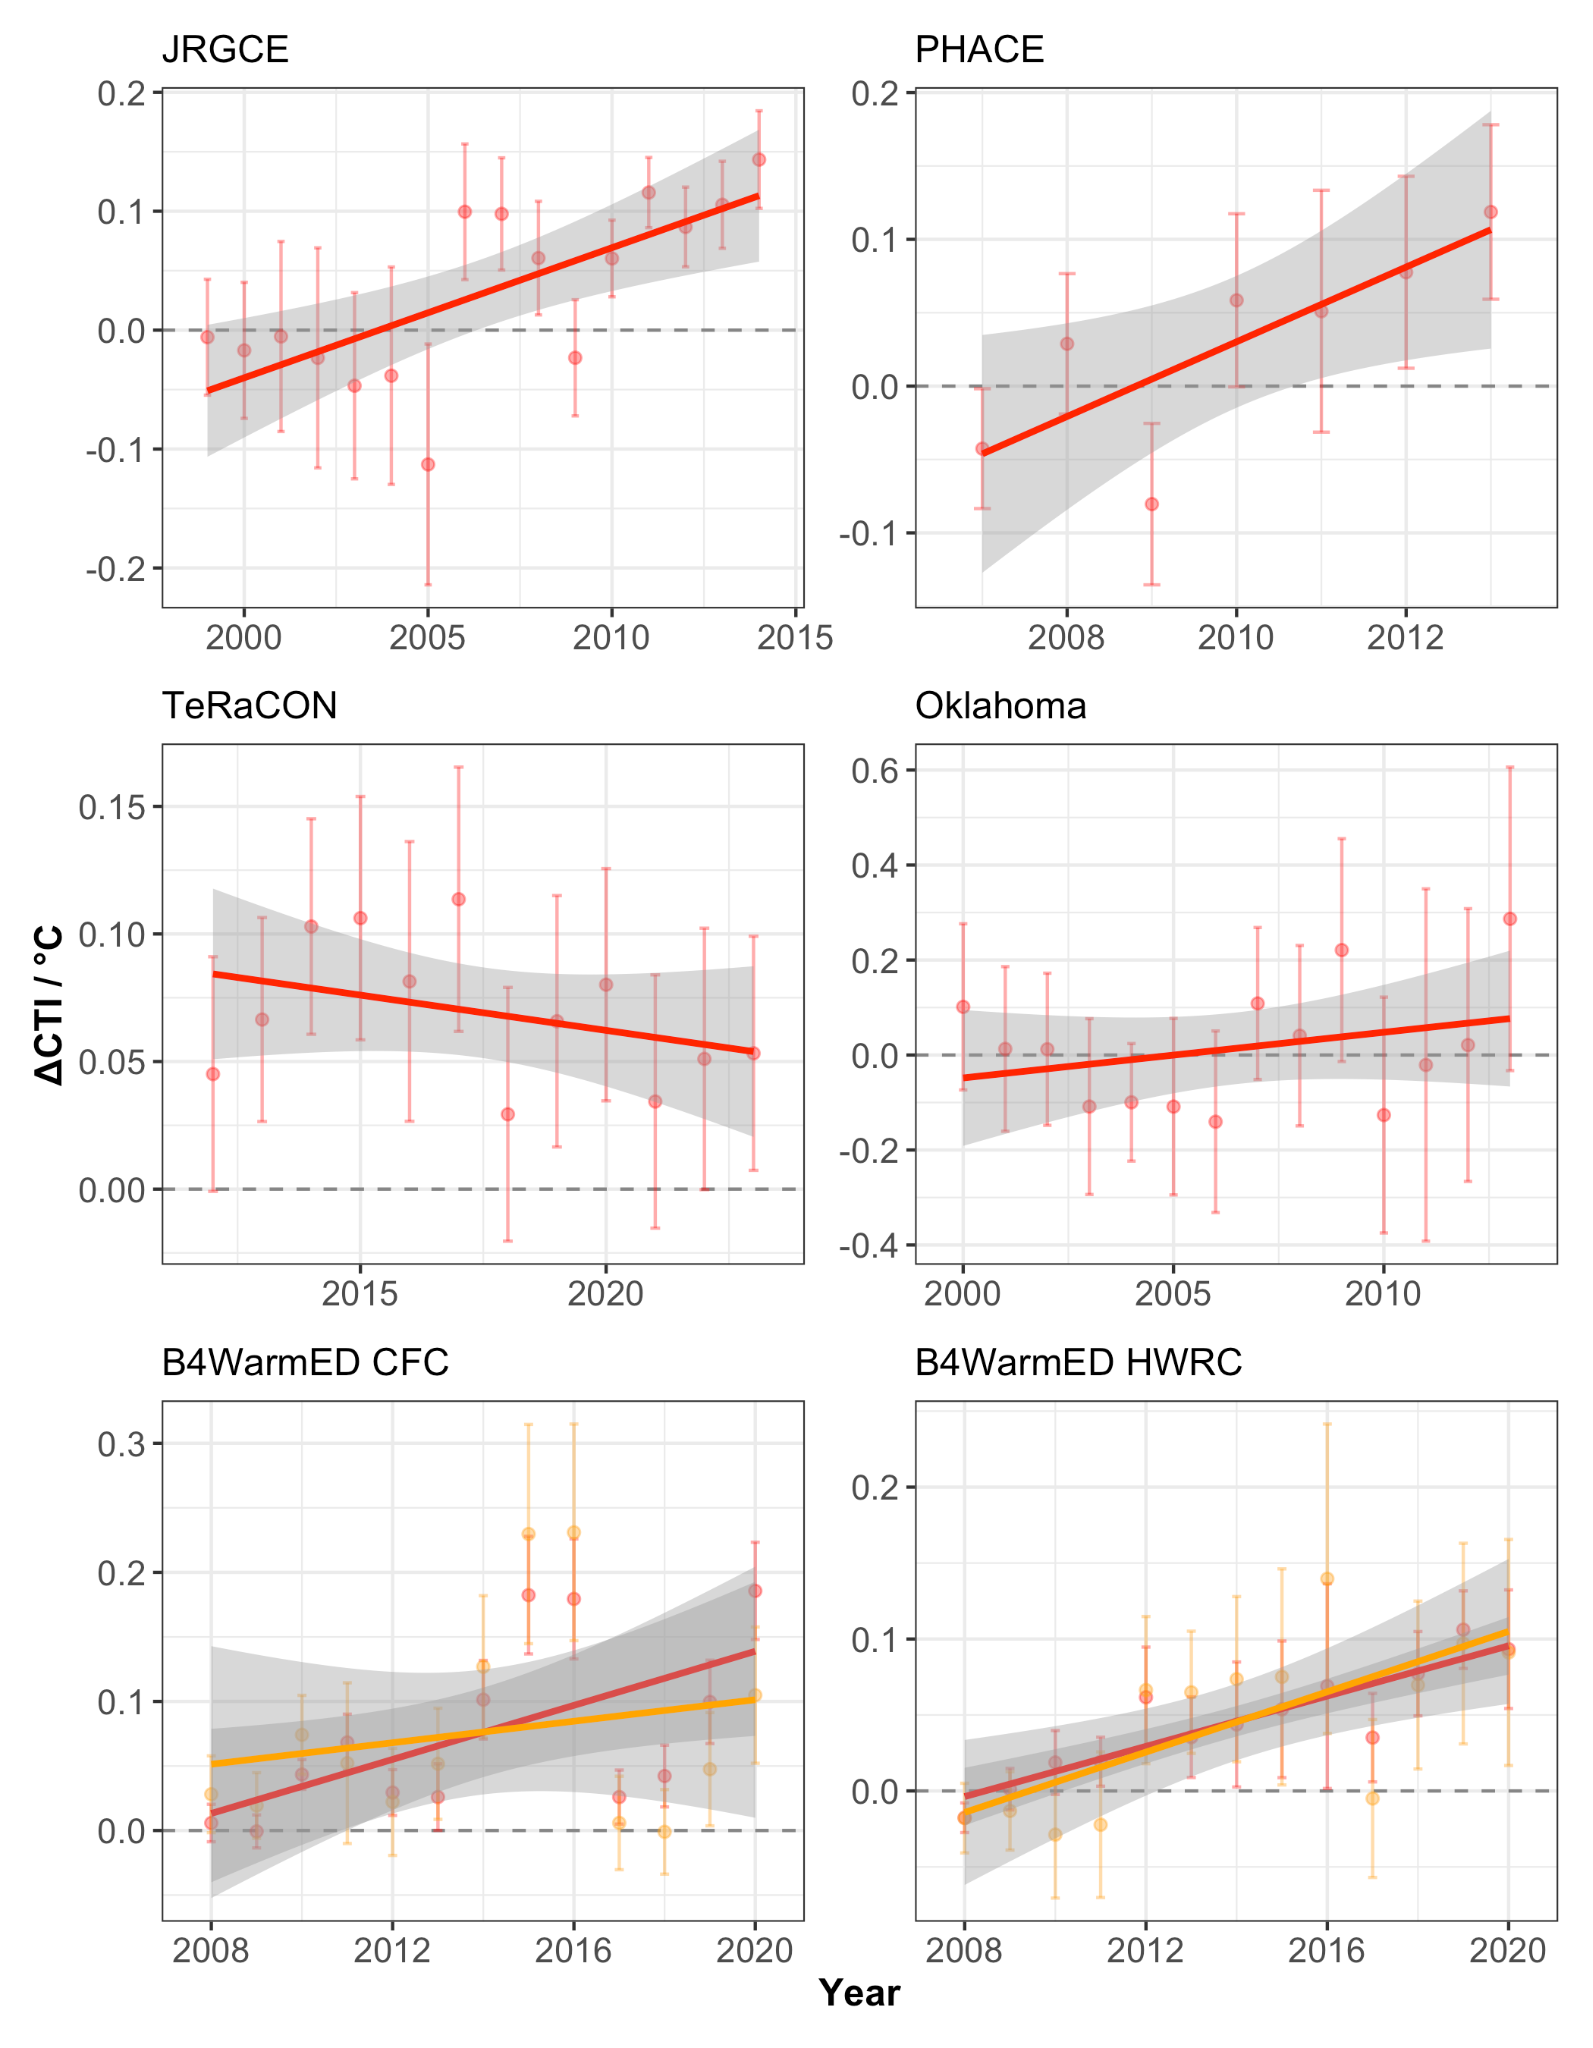


**Figure S2.** The effect of the warming treatment on CTI over time for each experiment, scaled by the amount warmed (ΔCTI / °C). Points represent the mean CTI in warmed (red) or intermediate warming (orange) minus the mean CTI in ambient for each year (ΔCTI) divided by the amount warmed in the experiment (°C) ± the standard error of the difference between means, and lines represent linear regressions with a 95% CI.


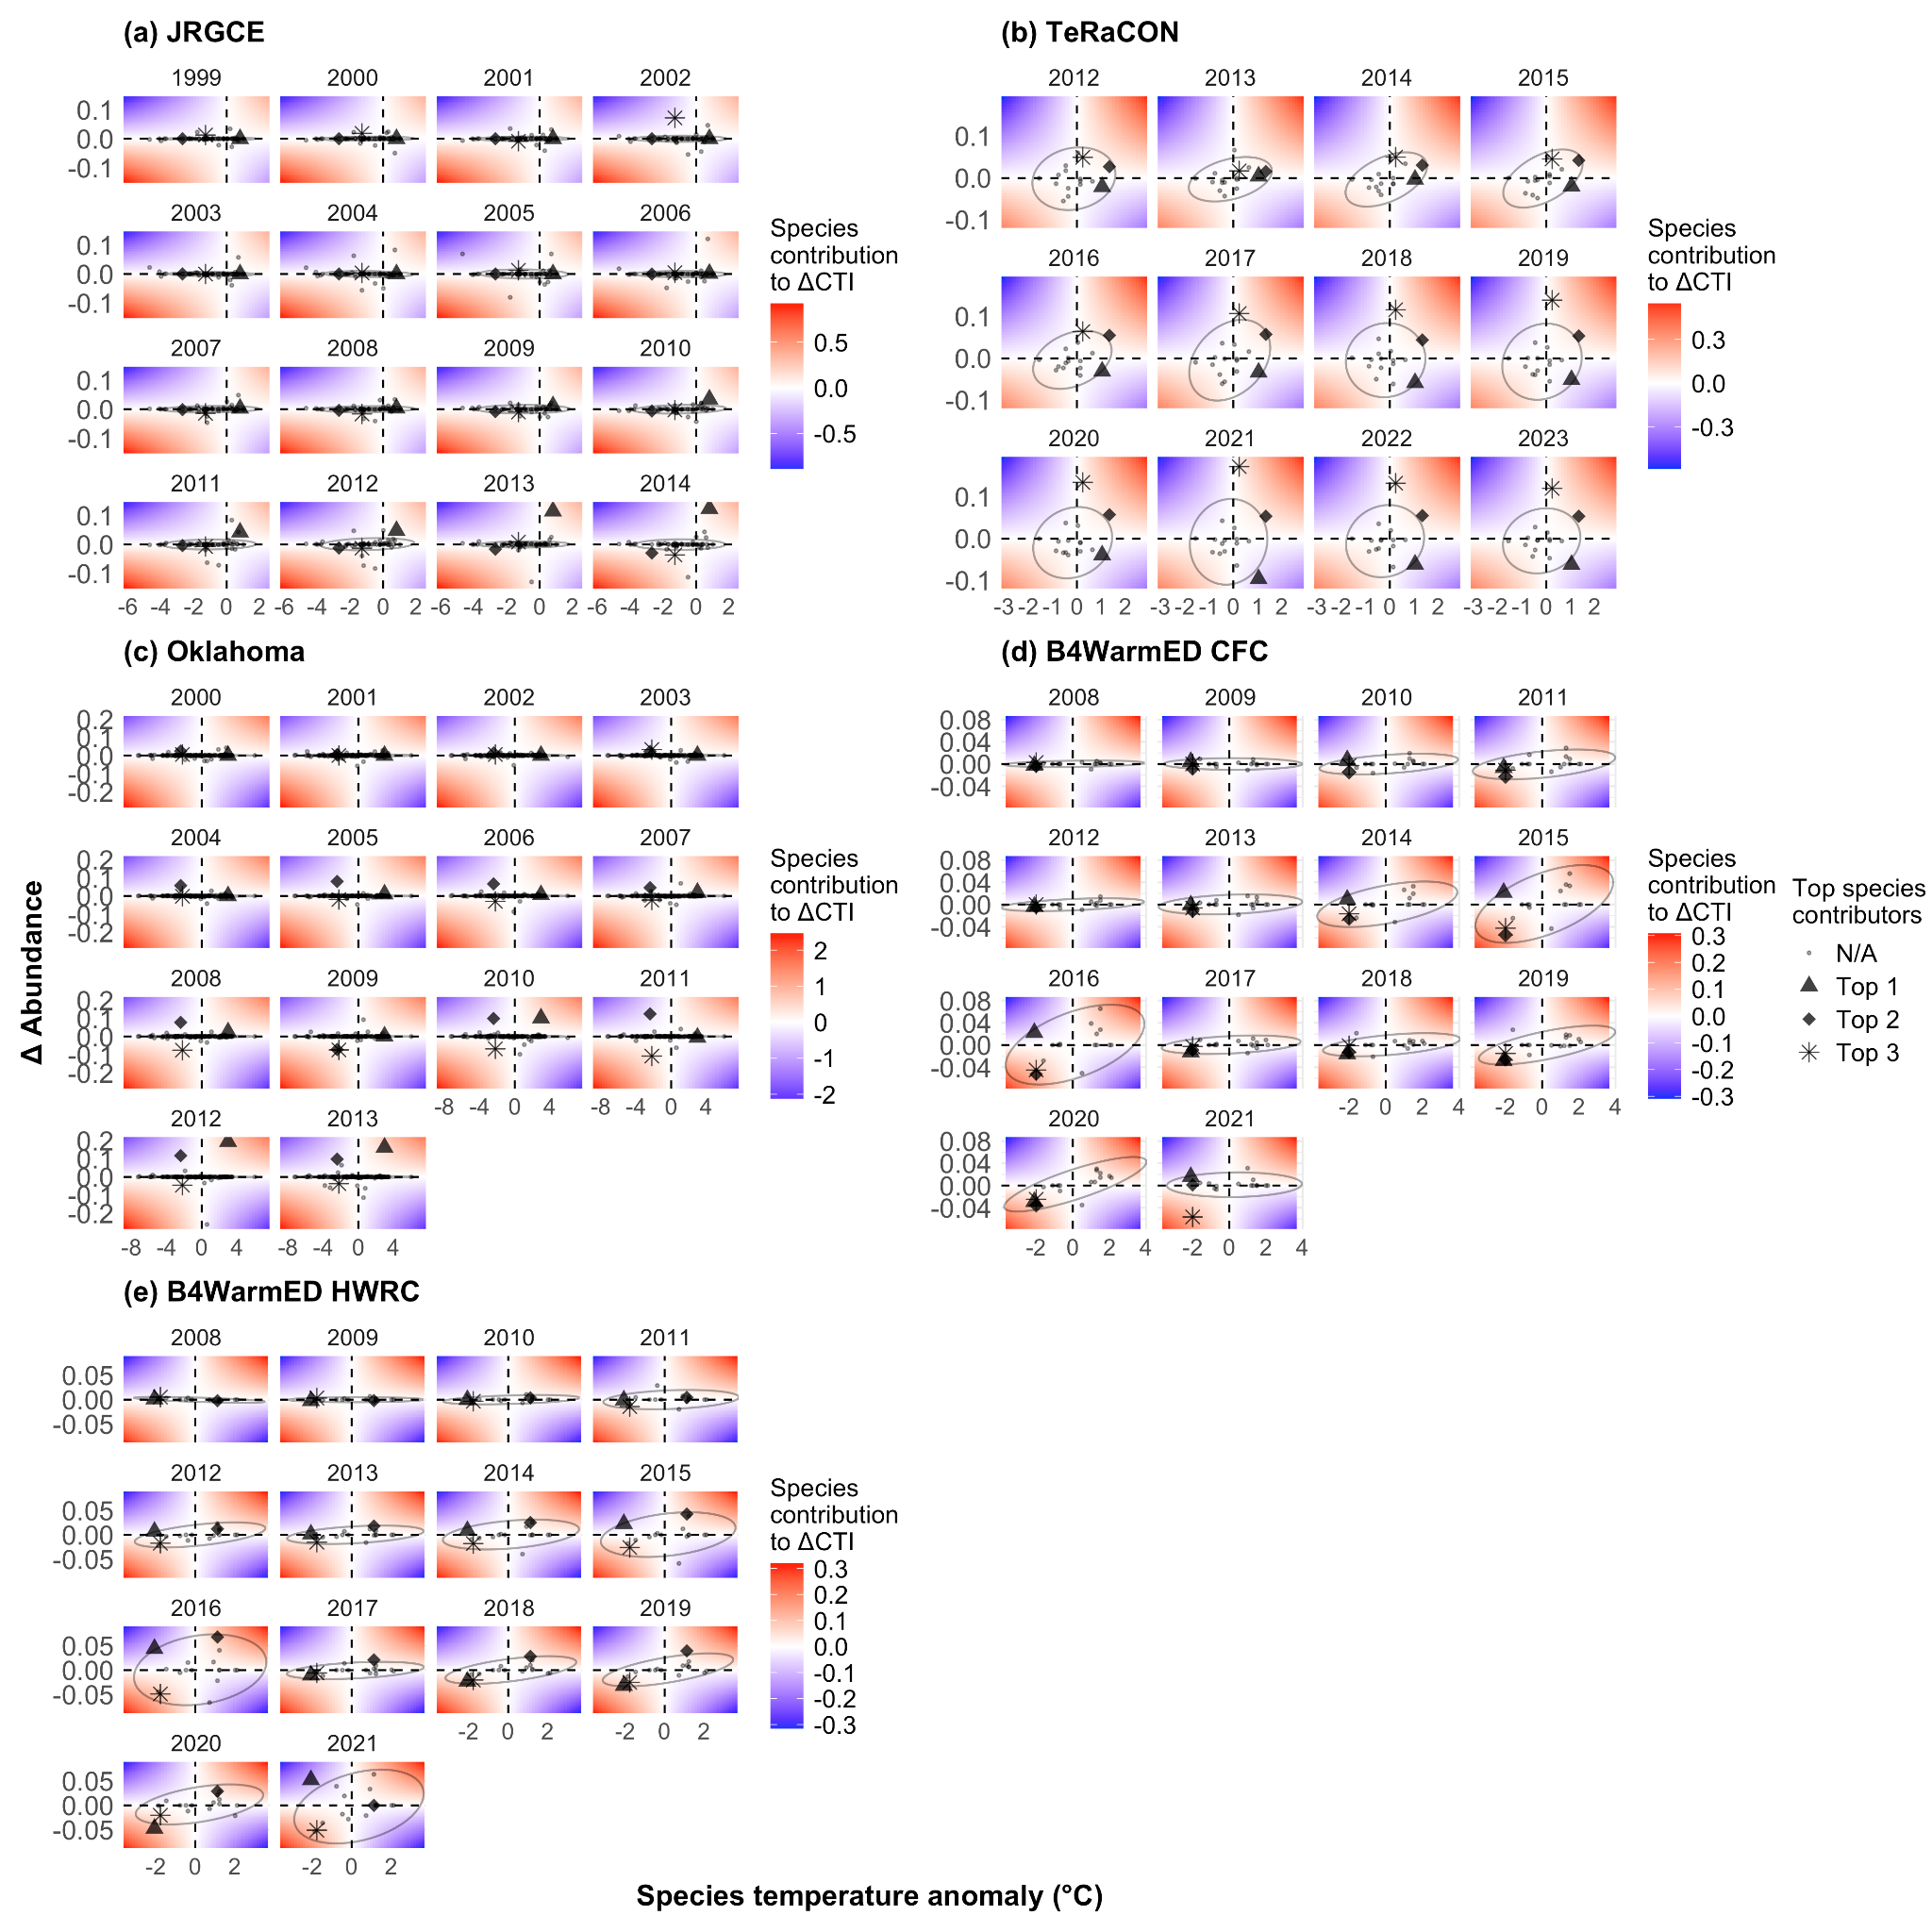


**Figure S3.** Species contributions to ΔCTI for each experiment, each year. Each point represents a single species’ contribution value, which is the product of a species’ temperature anomaly (°C) and the treatment effect of warming on its abundance (Δ abundance). The ellipses represent the 95% CI for all species points in each year. Only the warmed treatment is shown for the B4WarmED experiments (not the intermediate warming treatment).


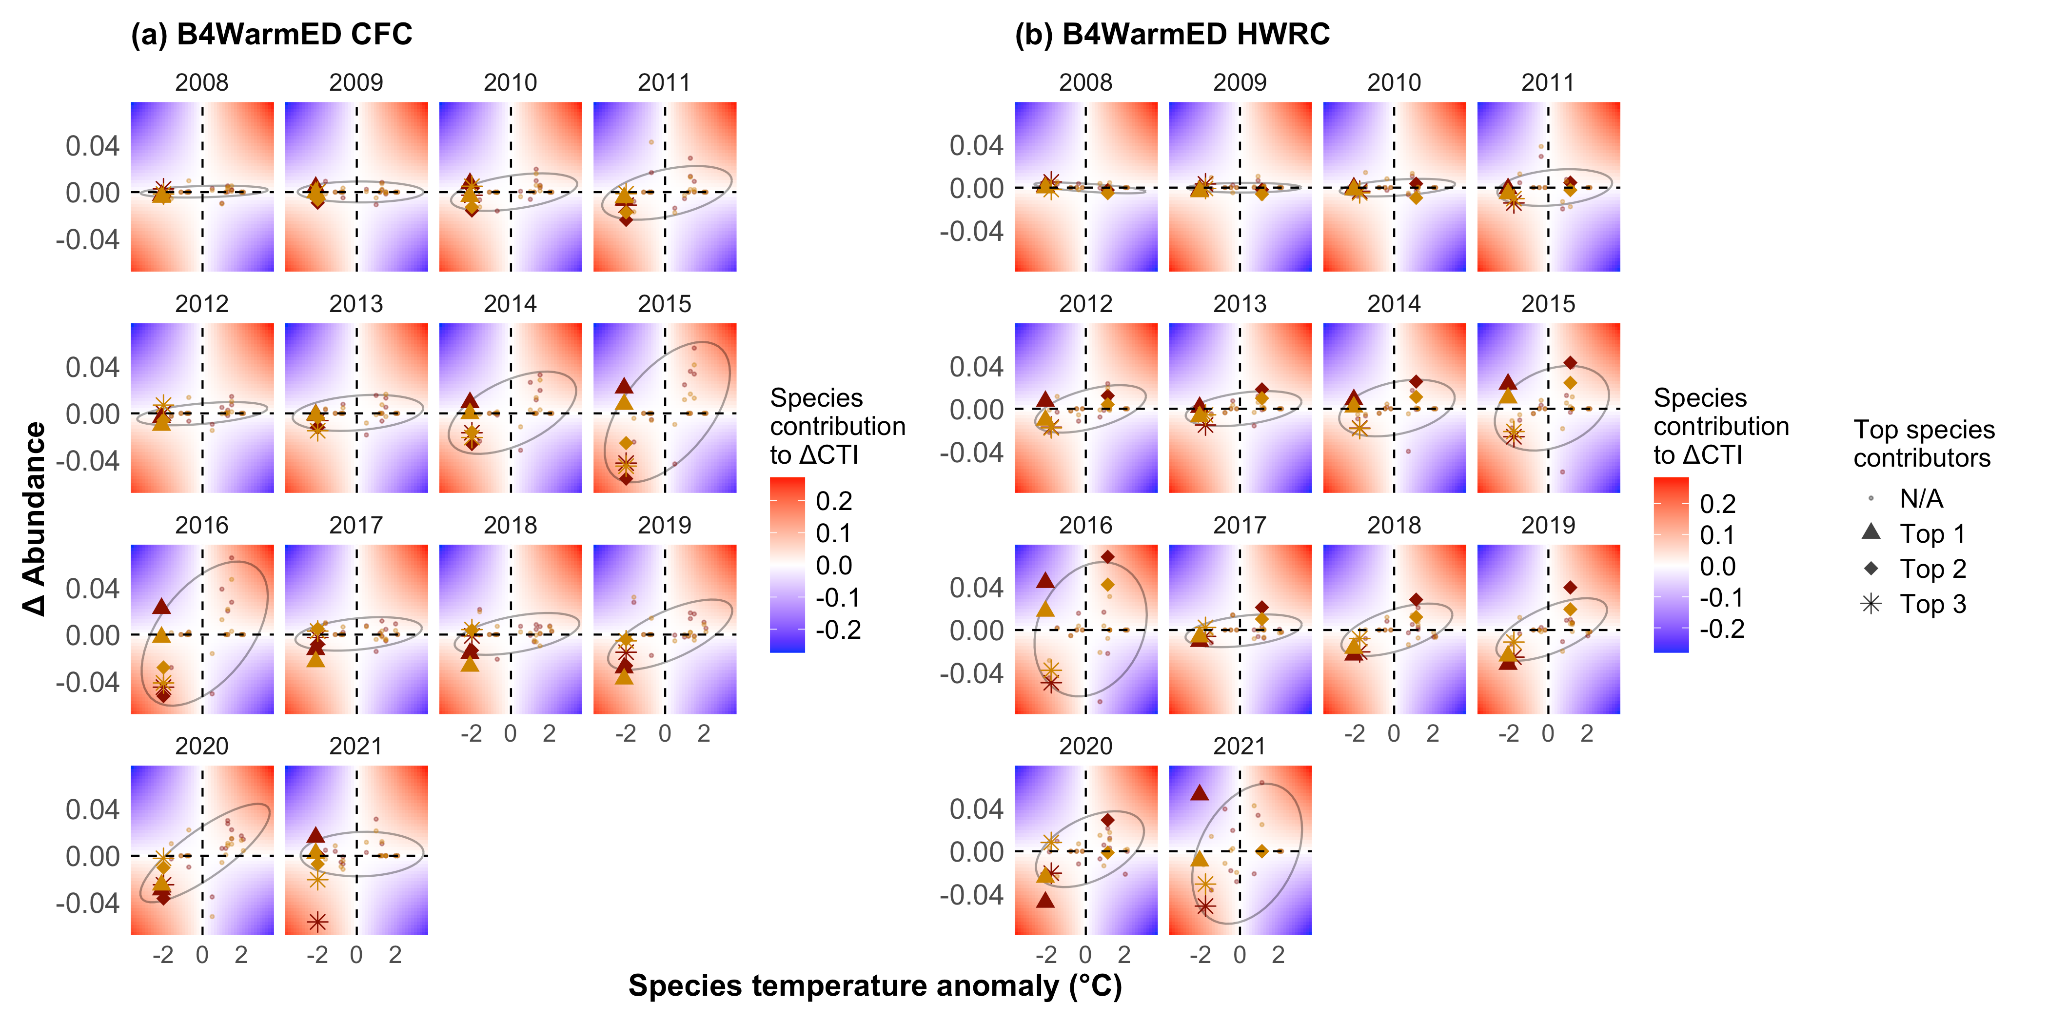


**Figure S4.** Species contributions to ΔCTI each year for B4WarmED CFC and HWRC. Species contributions are shown for both the intermediate (orange) and warmed (red) treatments. Each point represents a single species’ contribution value, which is the product of a species’ temperature anomaly (°C) and the treatment effect of warming on its abundance (Δ abundance). The ellipse represents the 95% CI for all species points.


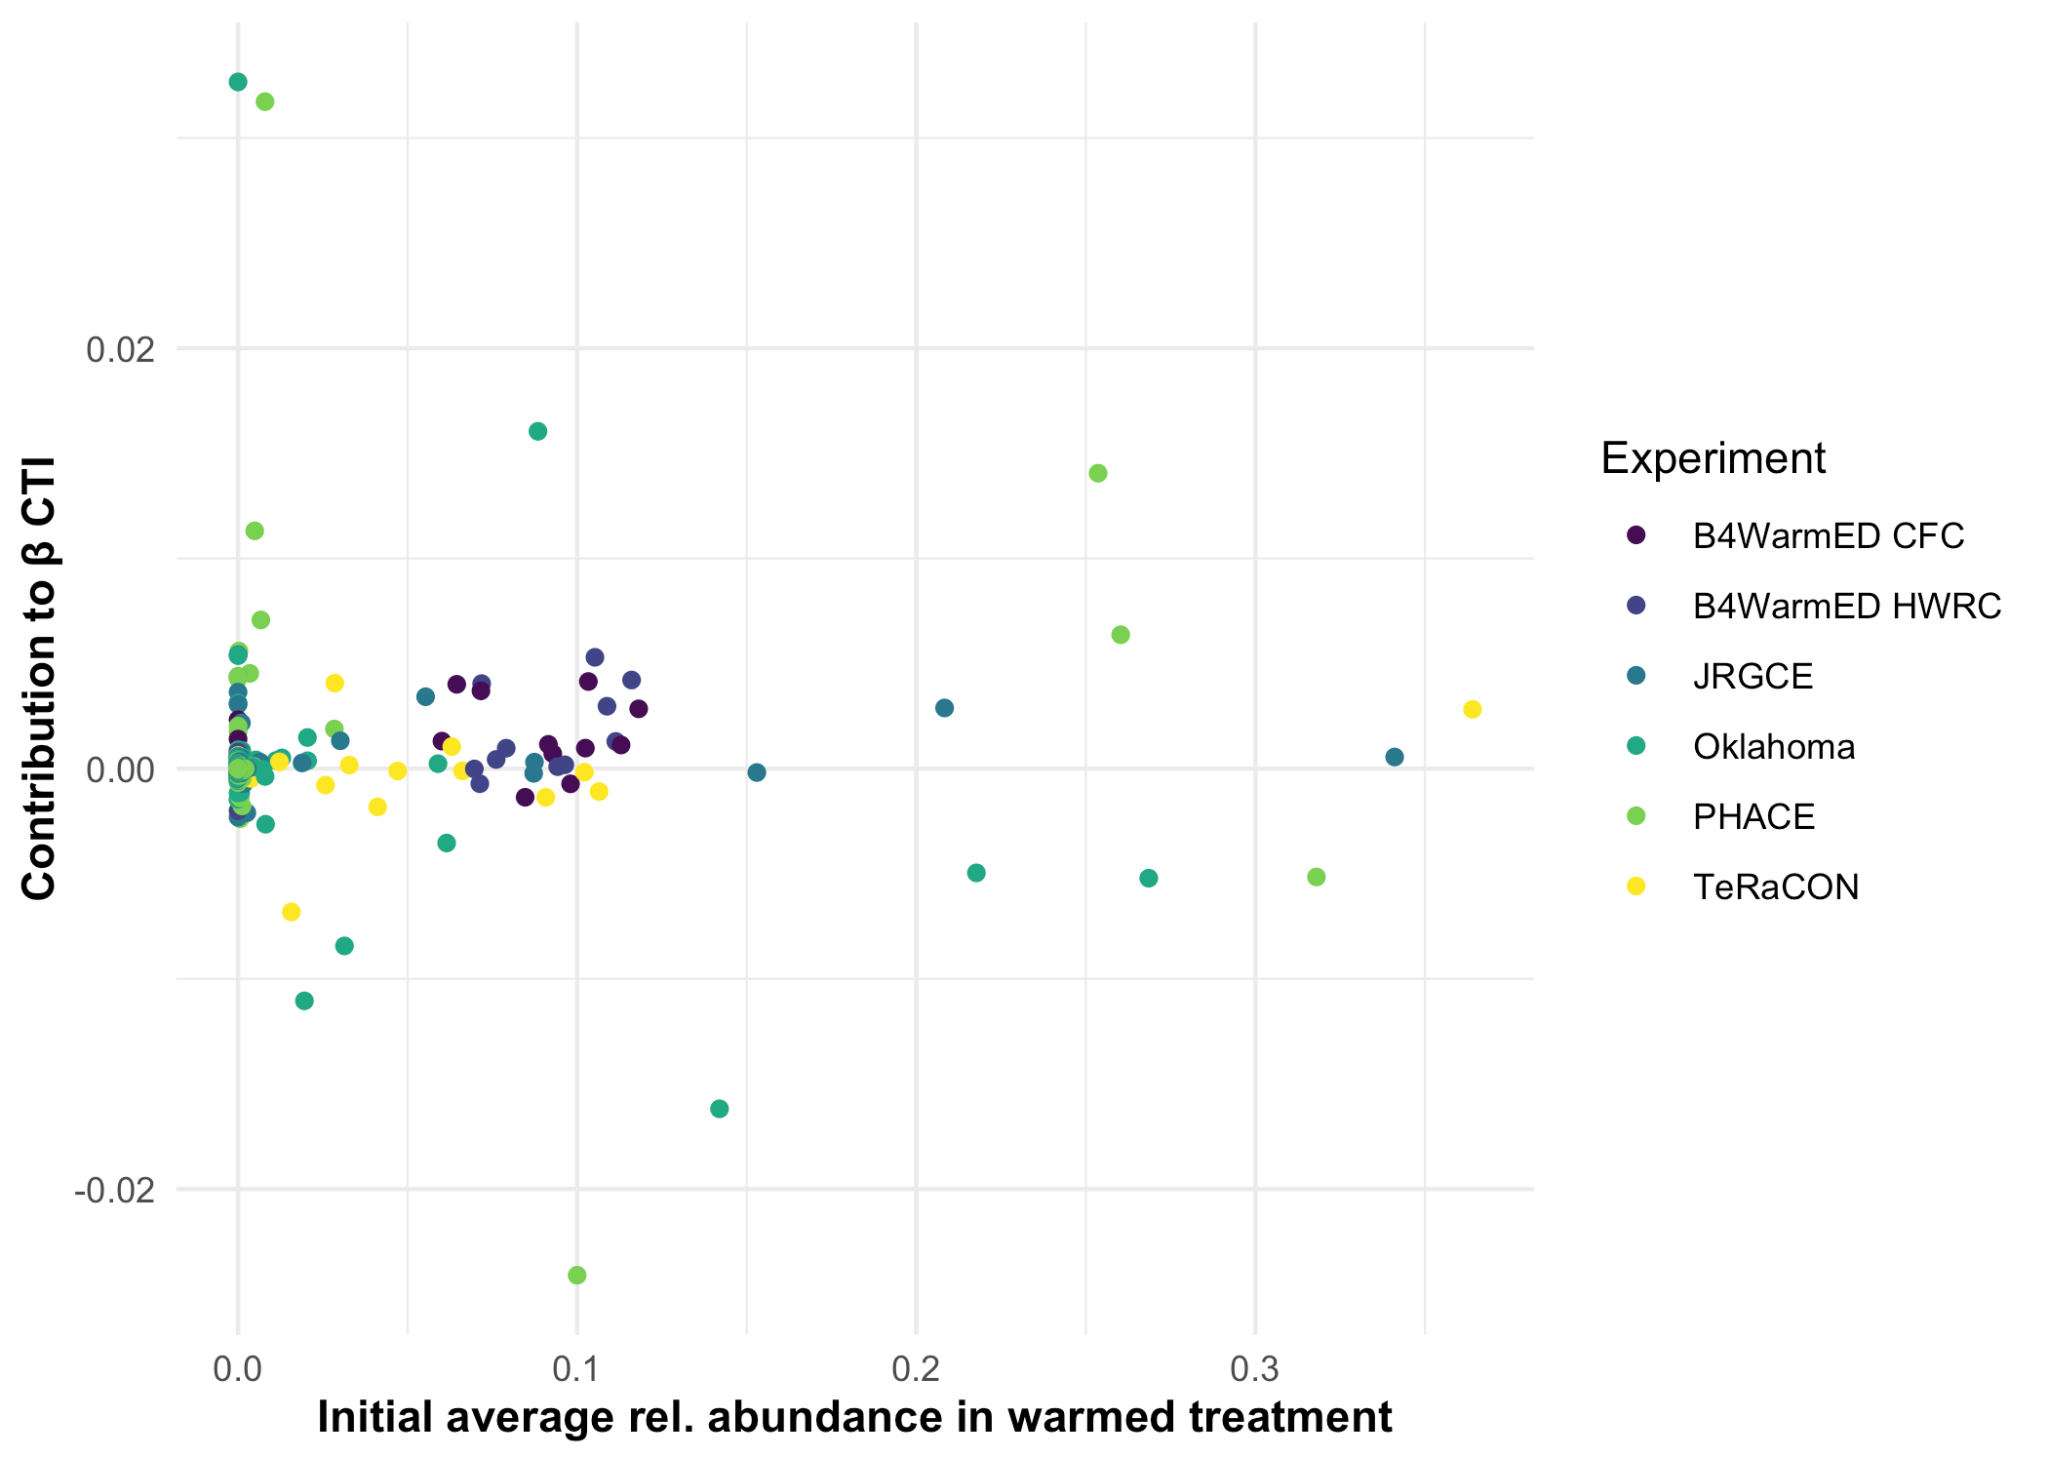


**Figure S5.** No relationship between species initial (year = 1) average relative abundance in the warmed treatment and their final contributions to thermophilization (β CTI) over time. Each point represents a single species, colored by which experiment it came from.


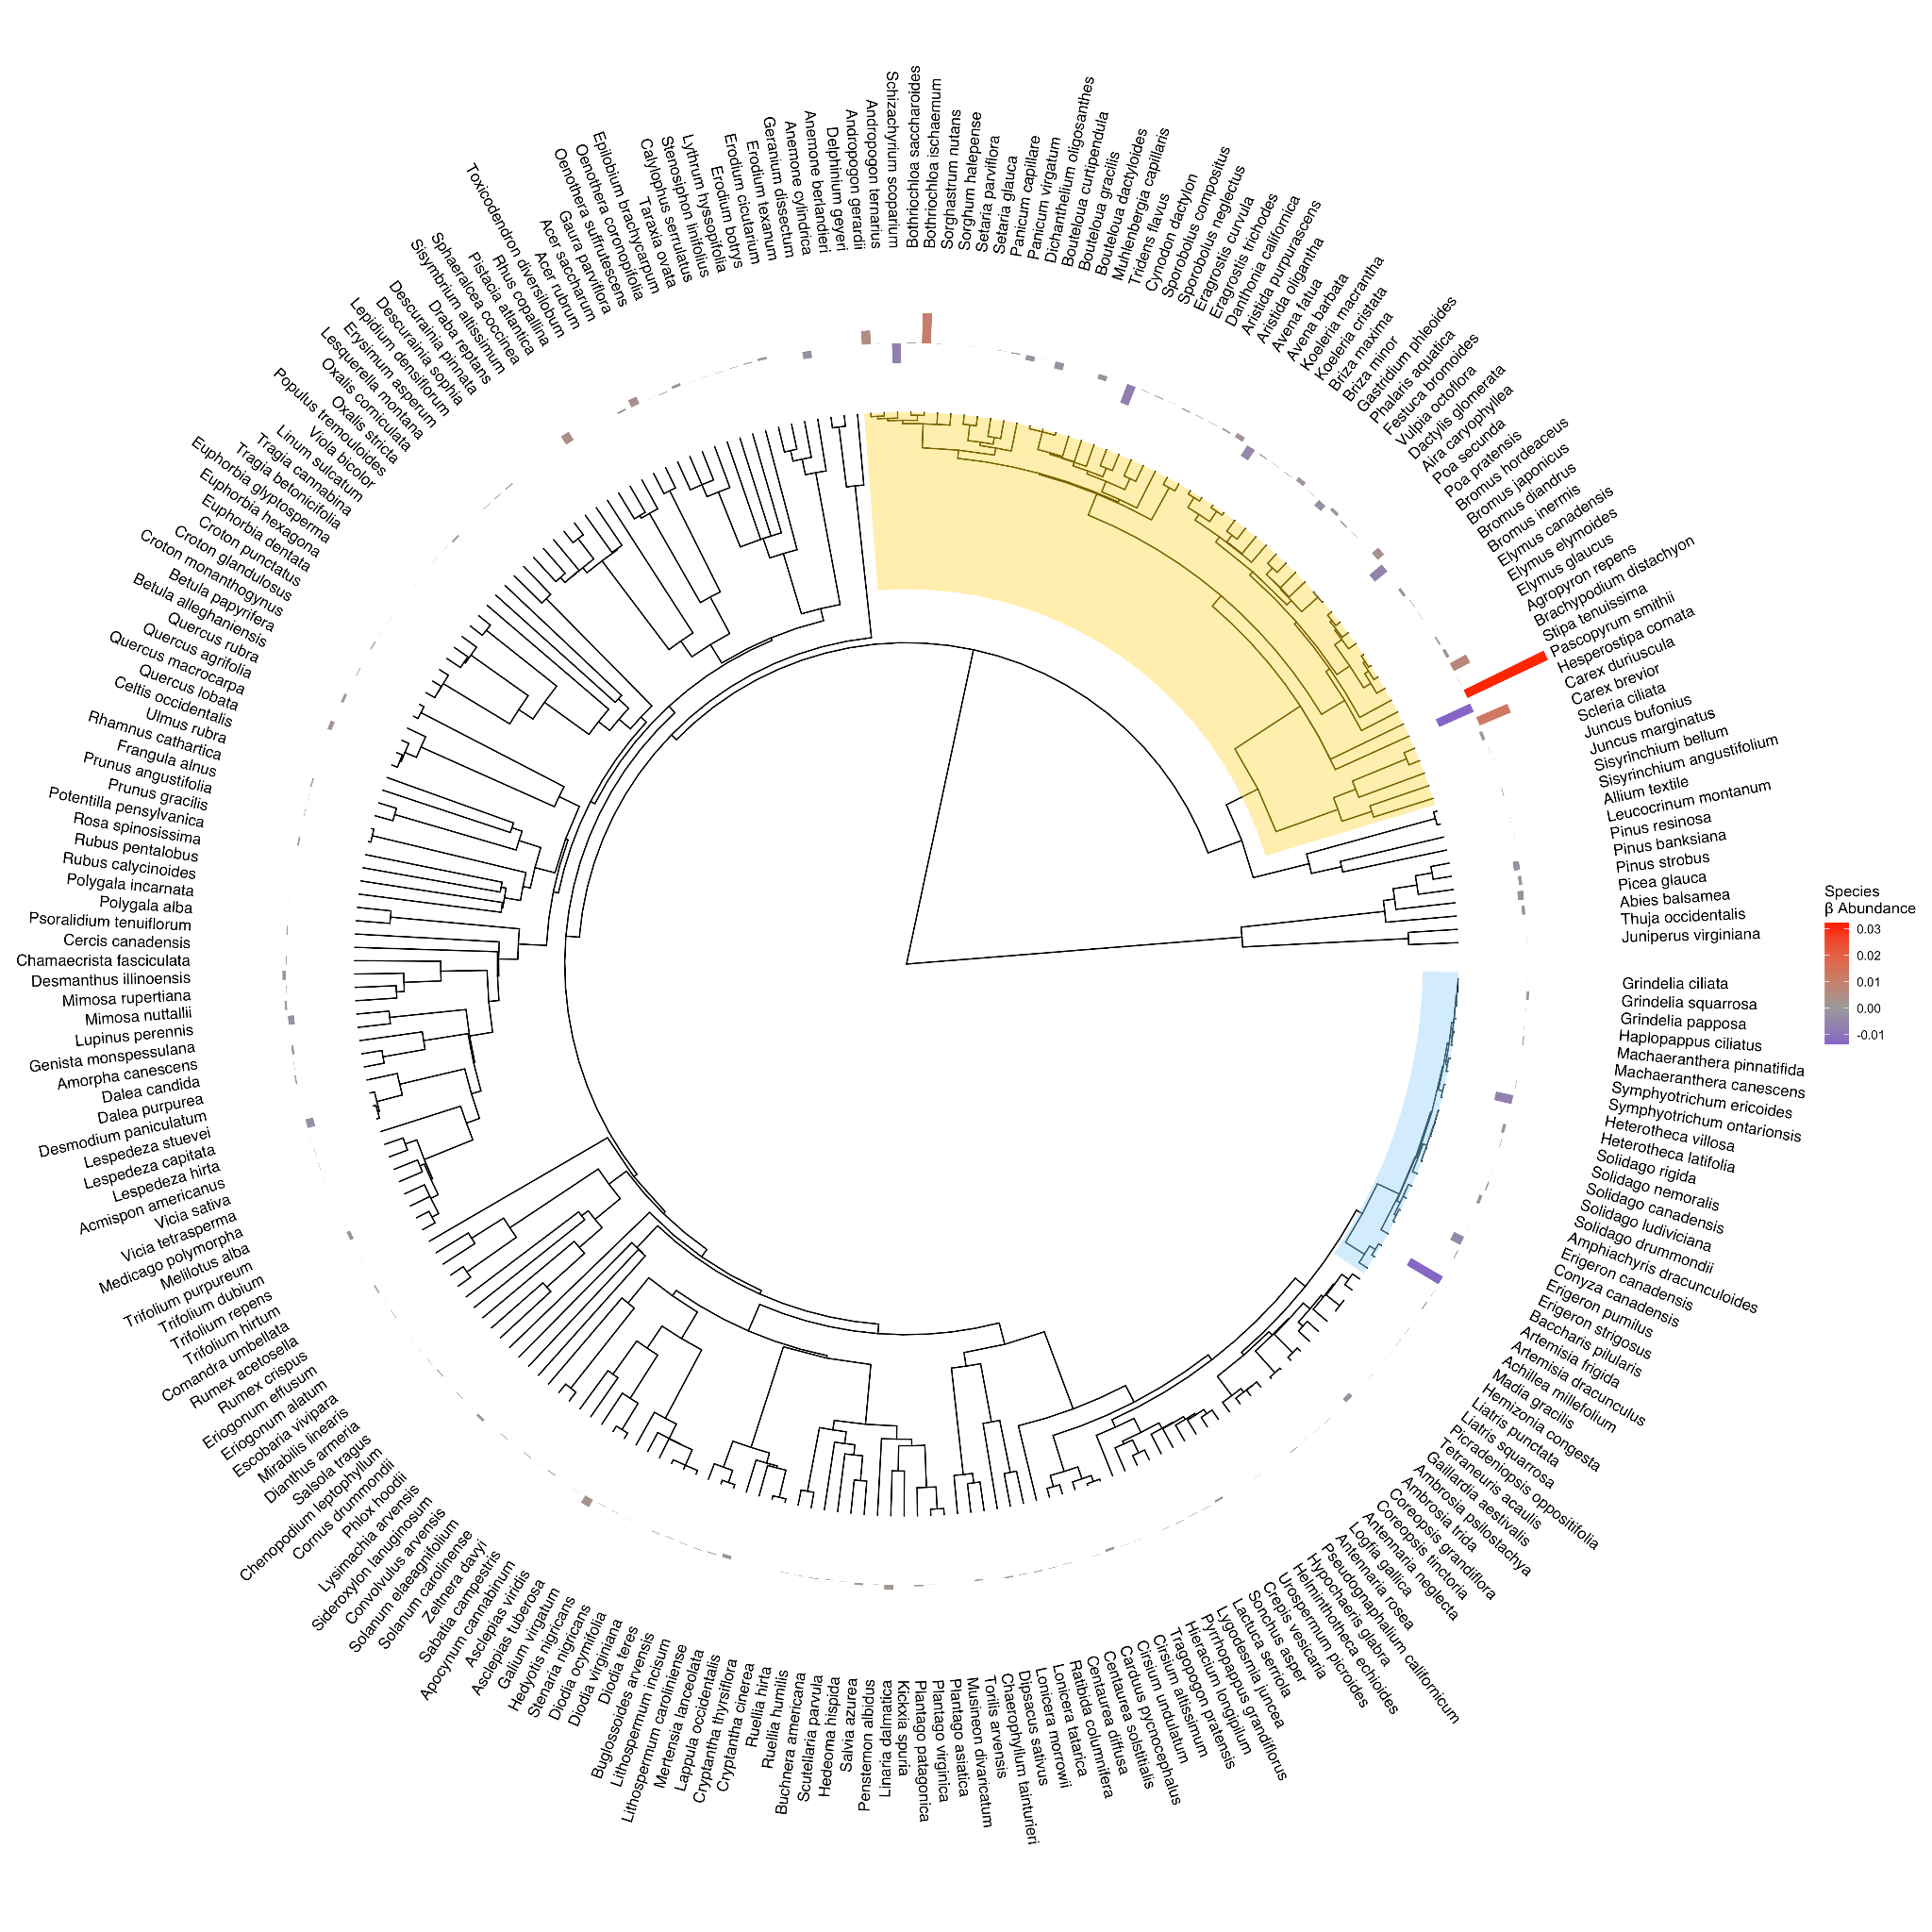


**Figure S6.** Phylogenetic tree of all species from all experiments. Bars represent the direction and magnitude of a species βΔAbundance. The yellow highlighted clade represents species from families Poaceae, Cyperaceae, and Juncaceae, whereas the blue highlighted clade represents species from the Astereae and Anthemideae tribes in the Asteraceae family.

**
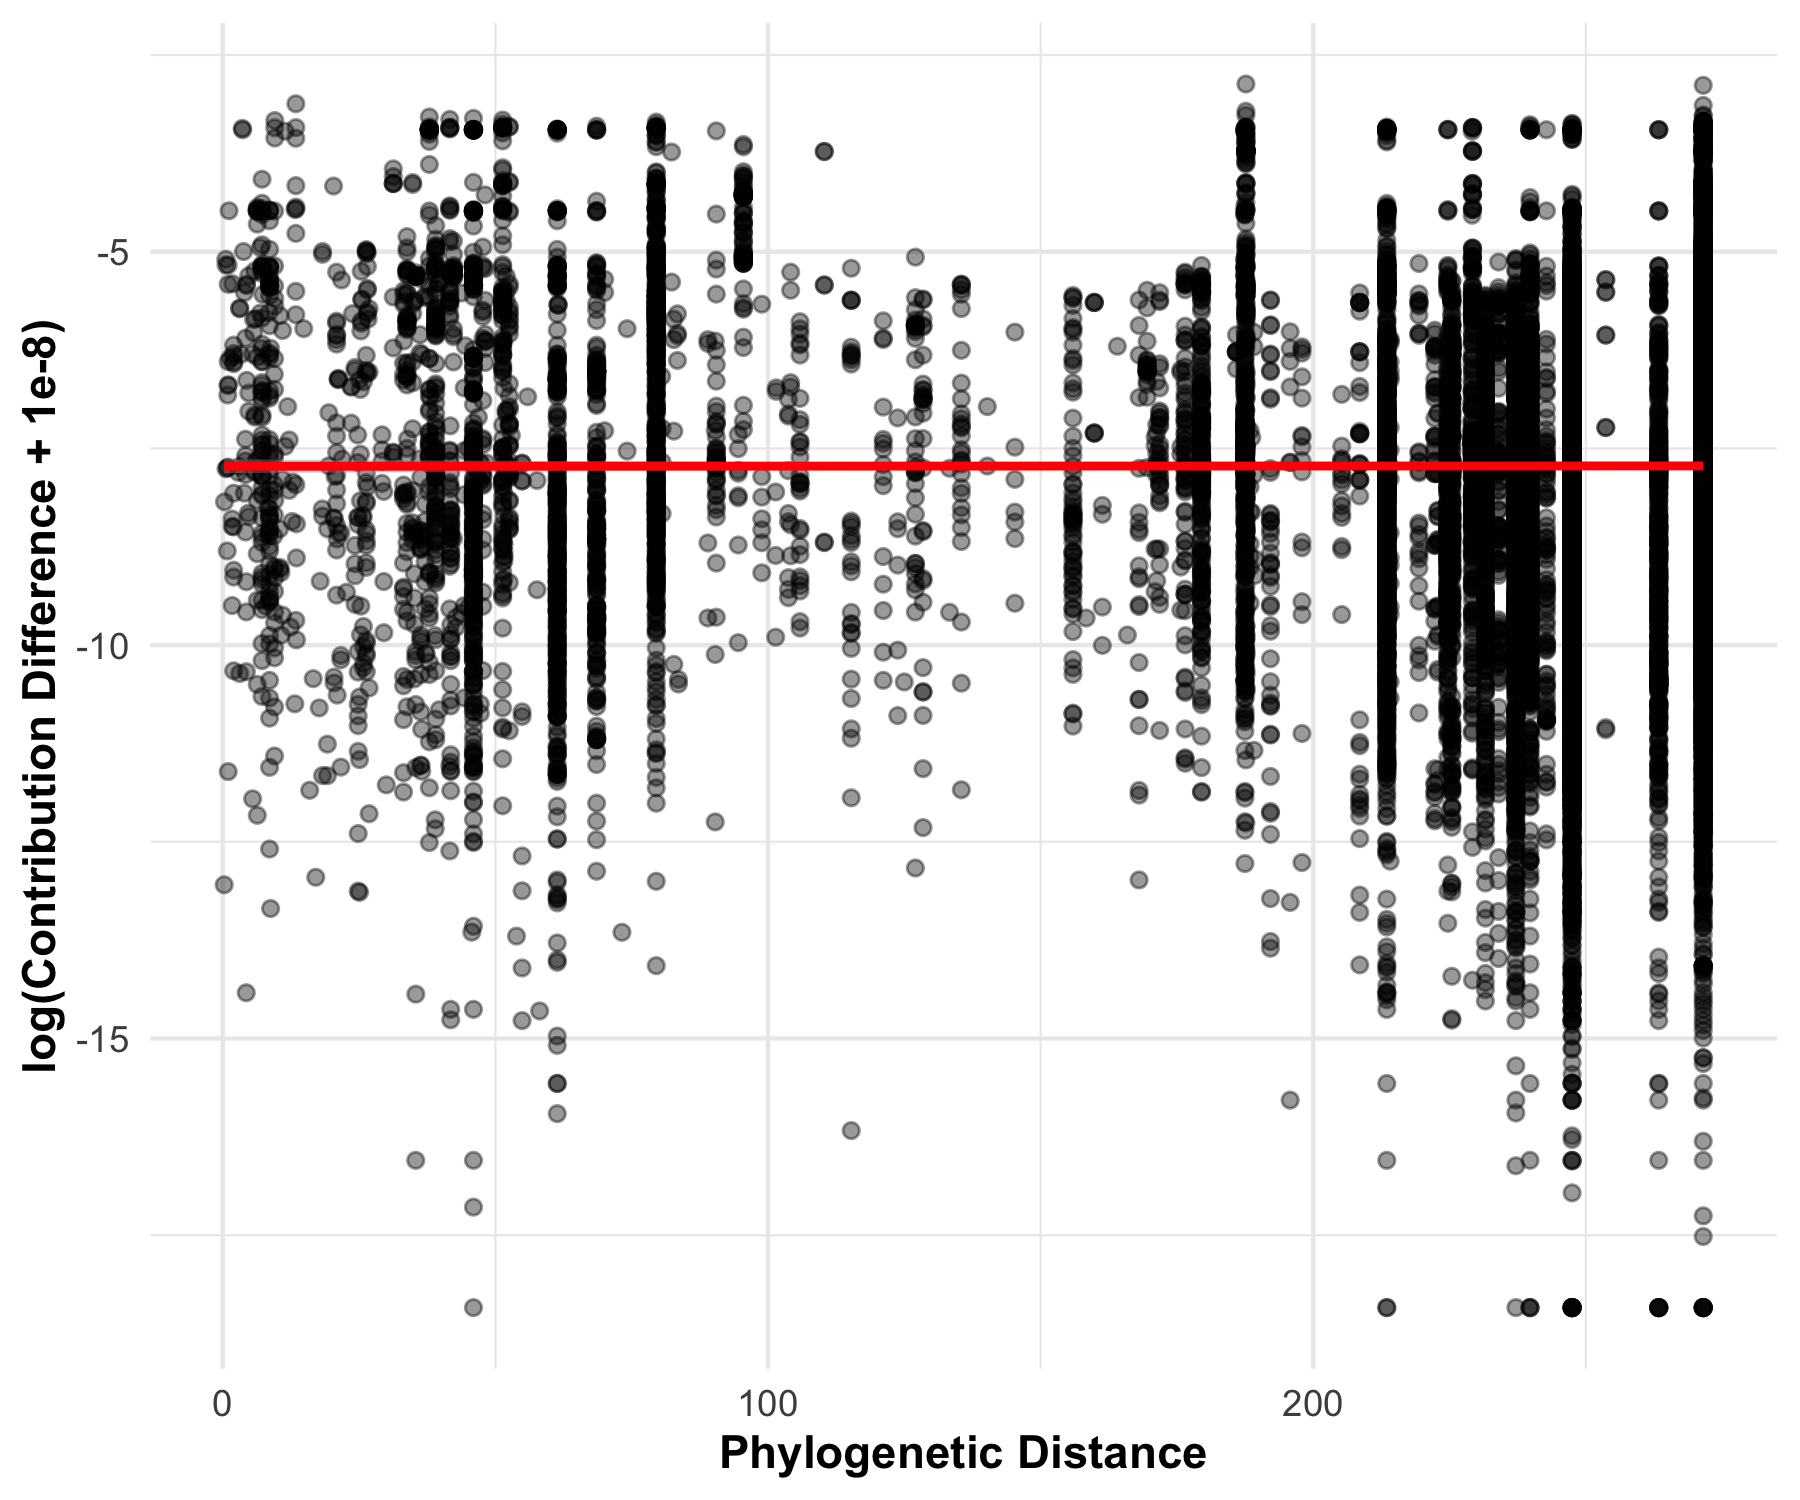
**

**Figure S7.** Species phylogenetic distance vs. contribution difference. Each point represents the phylogenetic distance between a species pair and the difference between their contribution values, and the red line is a fitted simple linear regression. There was no correlation between the distance and difference (p = 0.93).

**
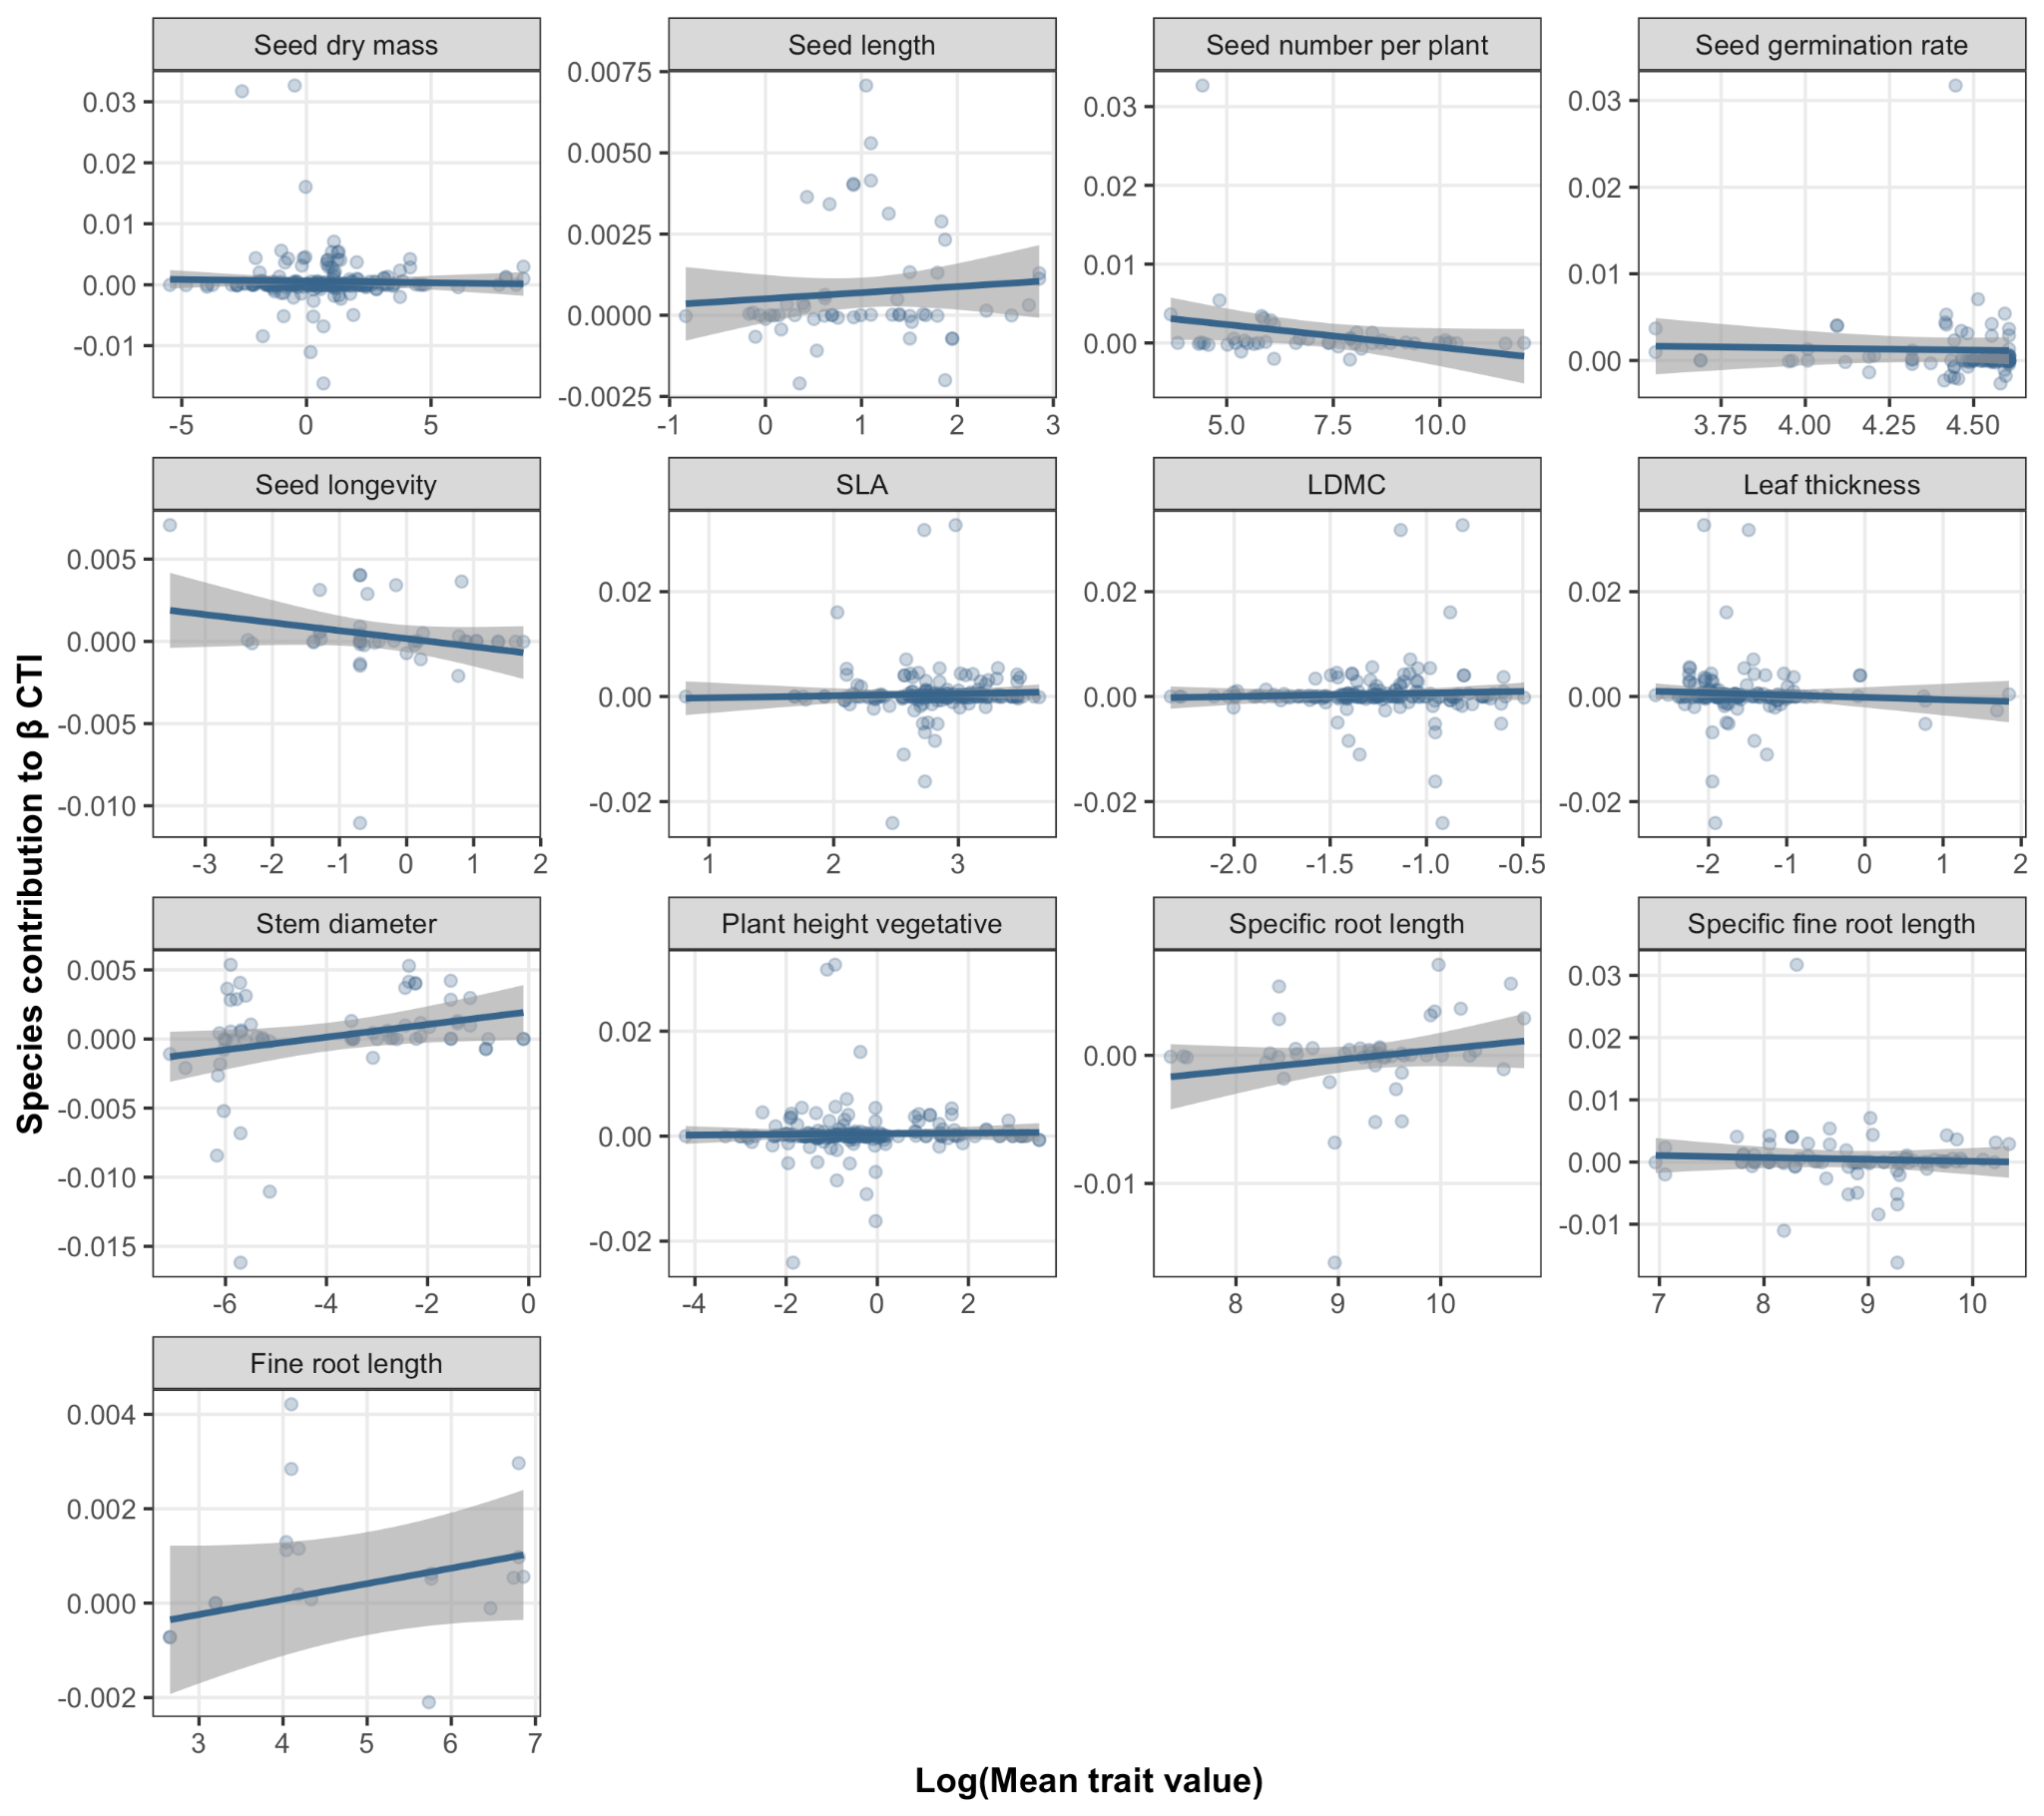
**

**Figure S8.** Relationships between mean plant trait values (log-transformed) and species contributions to βΔCTI. Each point in each plot represents a value for a single species, whereas the blue line and shaded region represents a fitted linear regression with a 95% confidence interval. No traits showed a significant relationship with species contributions.


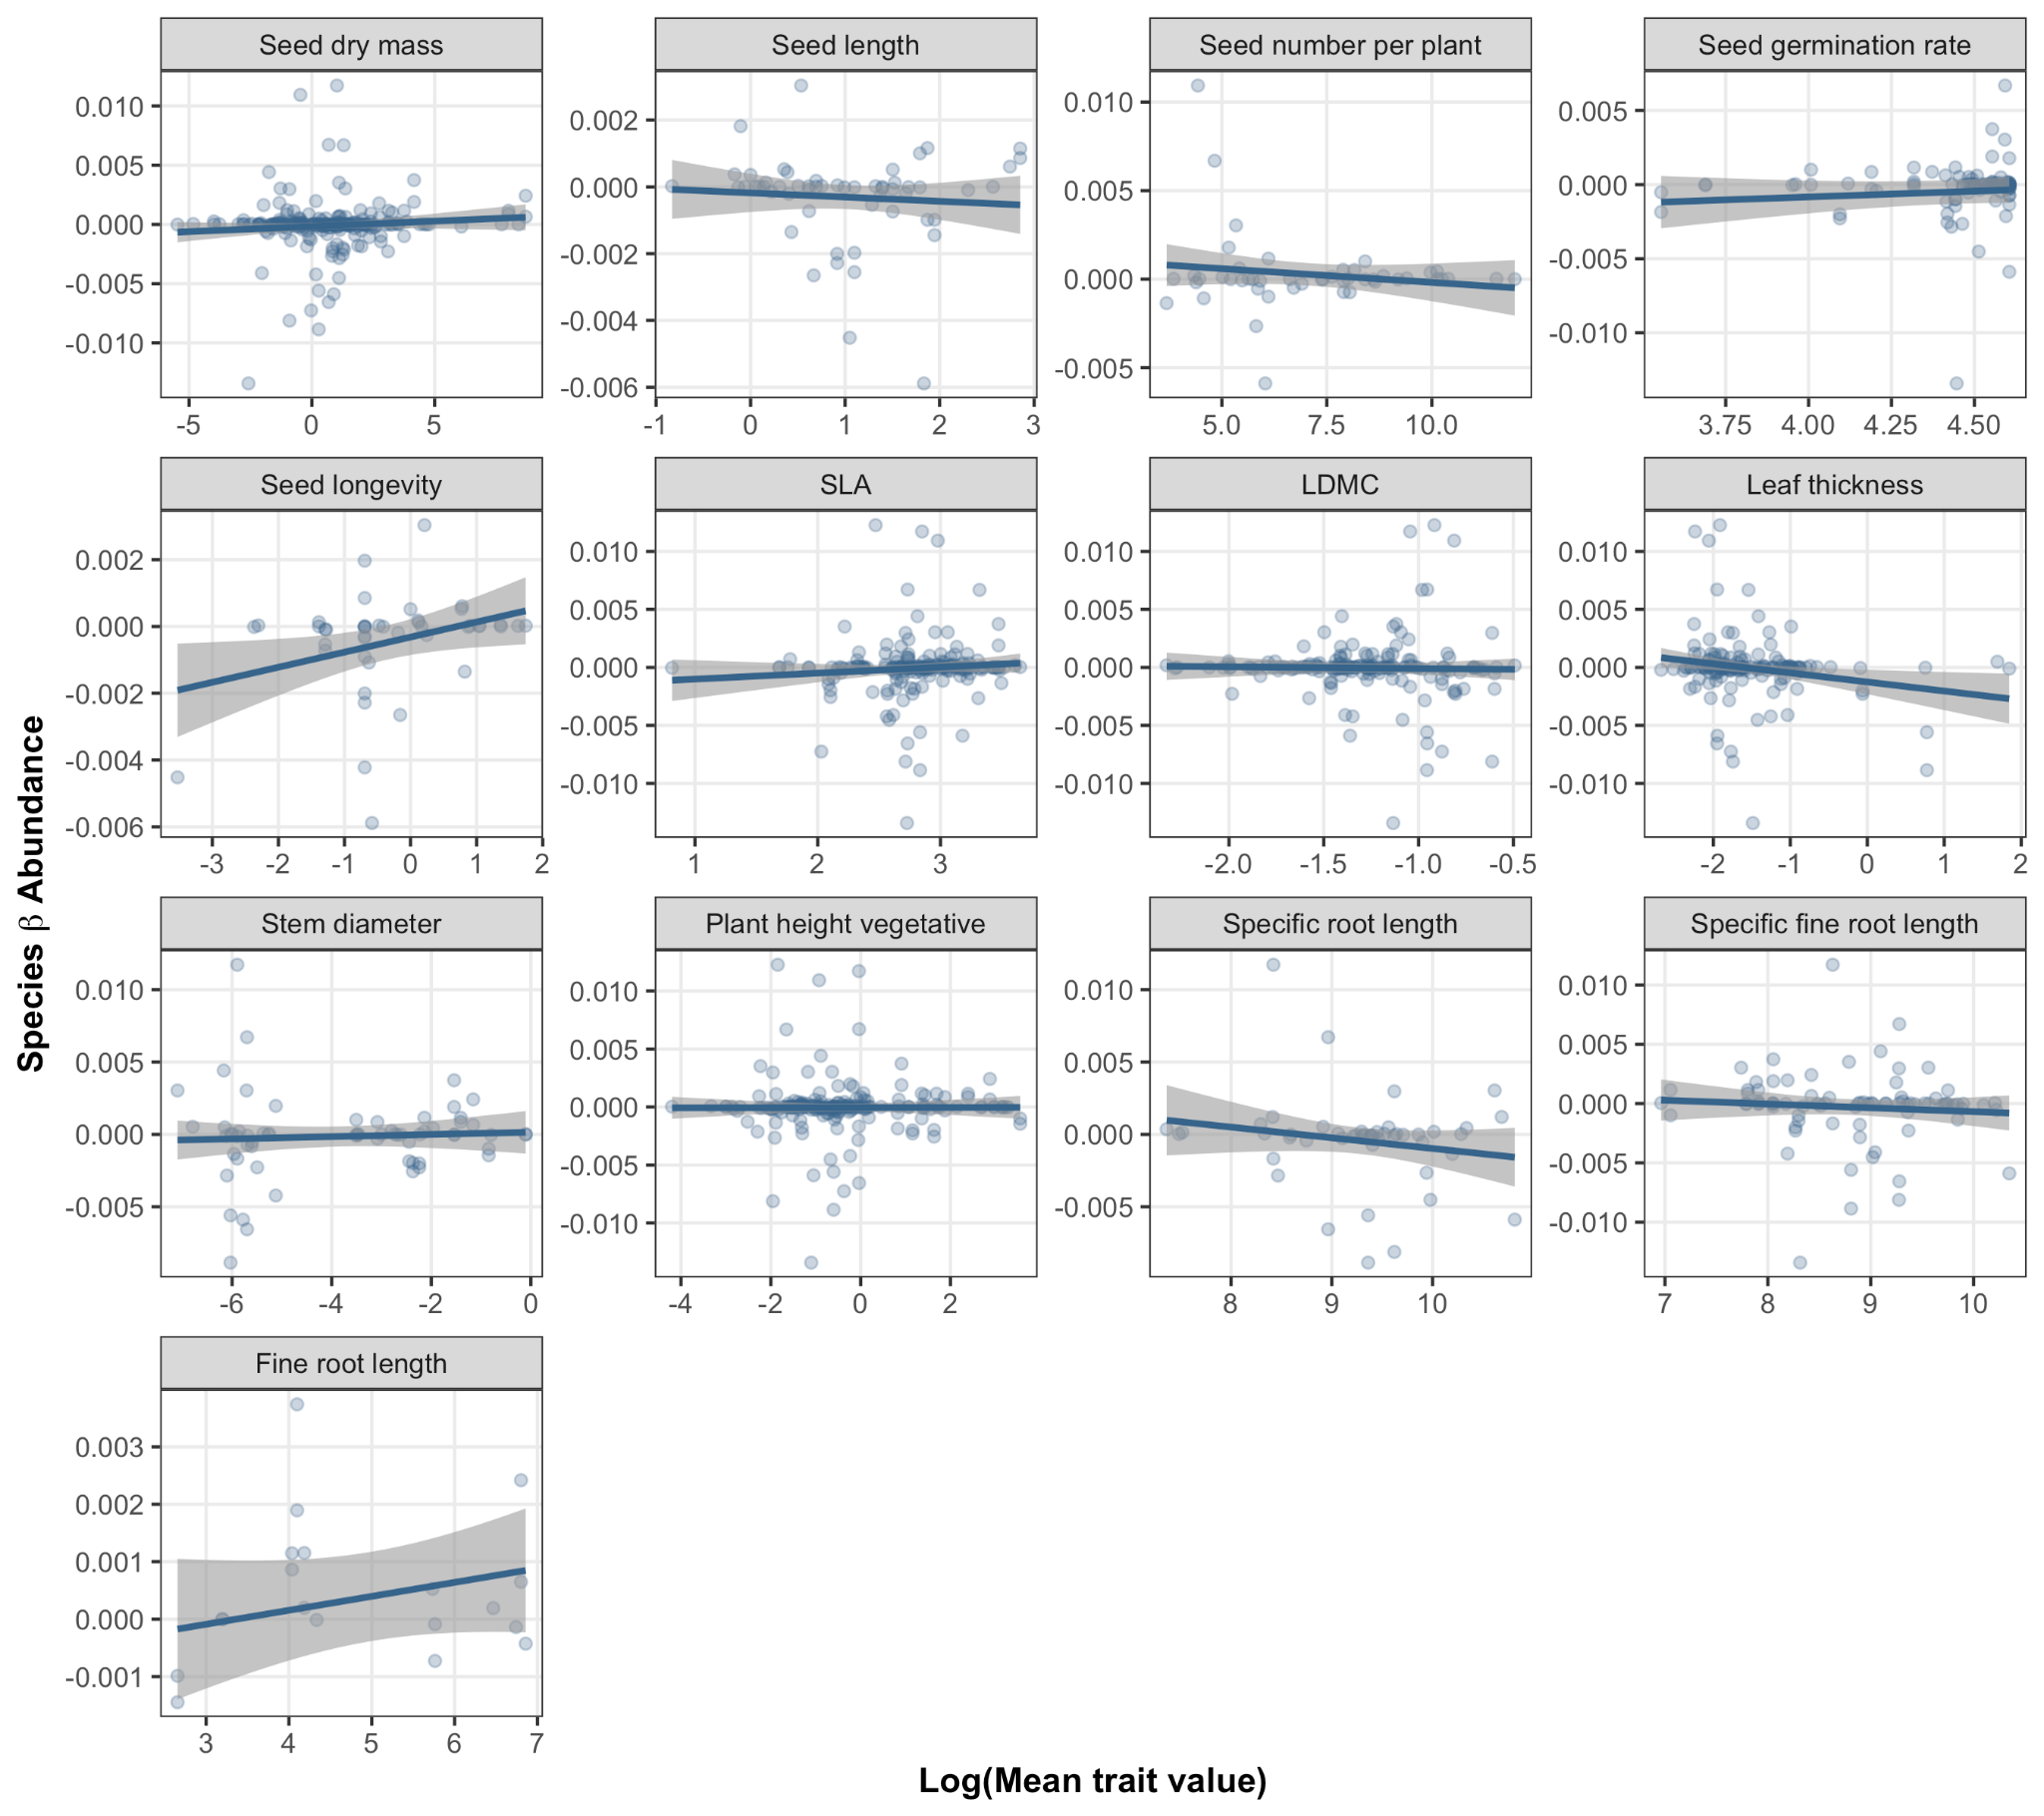


**Figure S9.** Relationships between mean plant trait values (log-transformed) and species changes in abundance due to warming (βΔAbundance). Each point in each plot represents a value for a single species, whereas the blue line and shaded region represents a fitted linear regression with a 95% confidence interval. No traits showed a significant relationship with species β abundance.


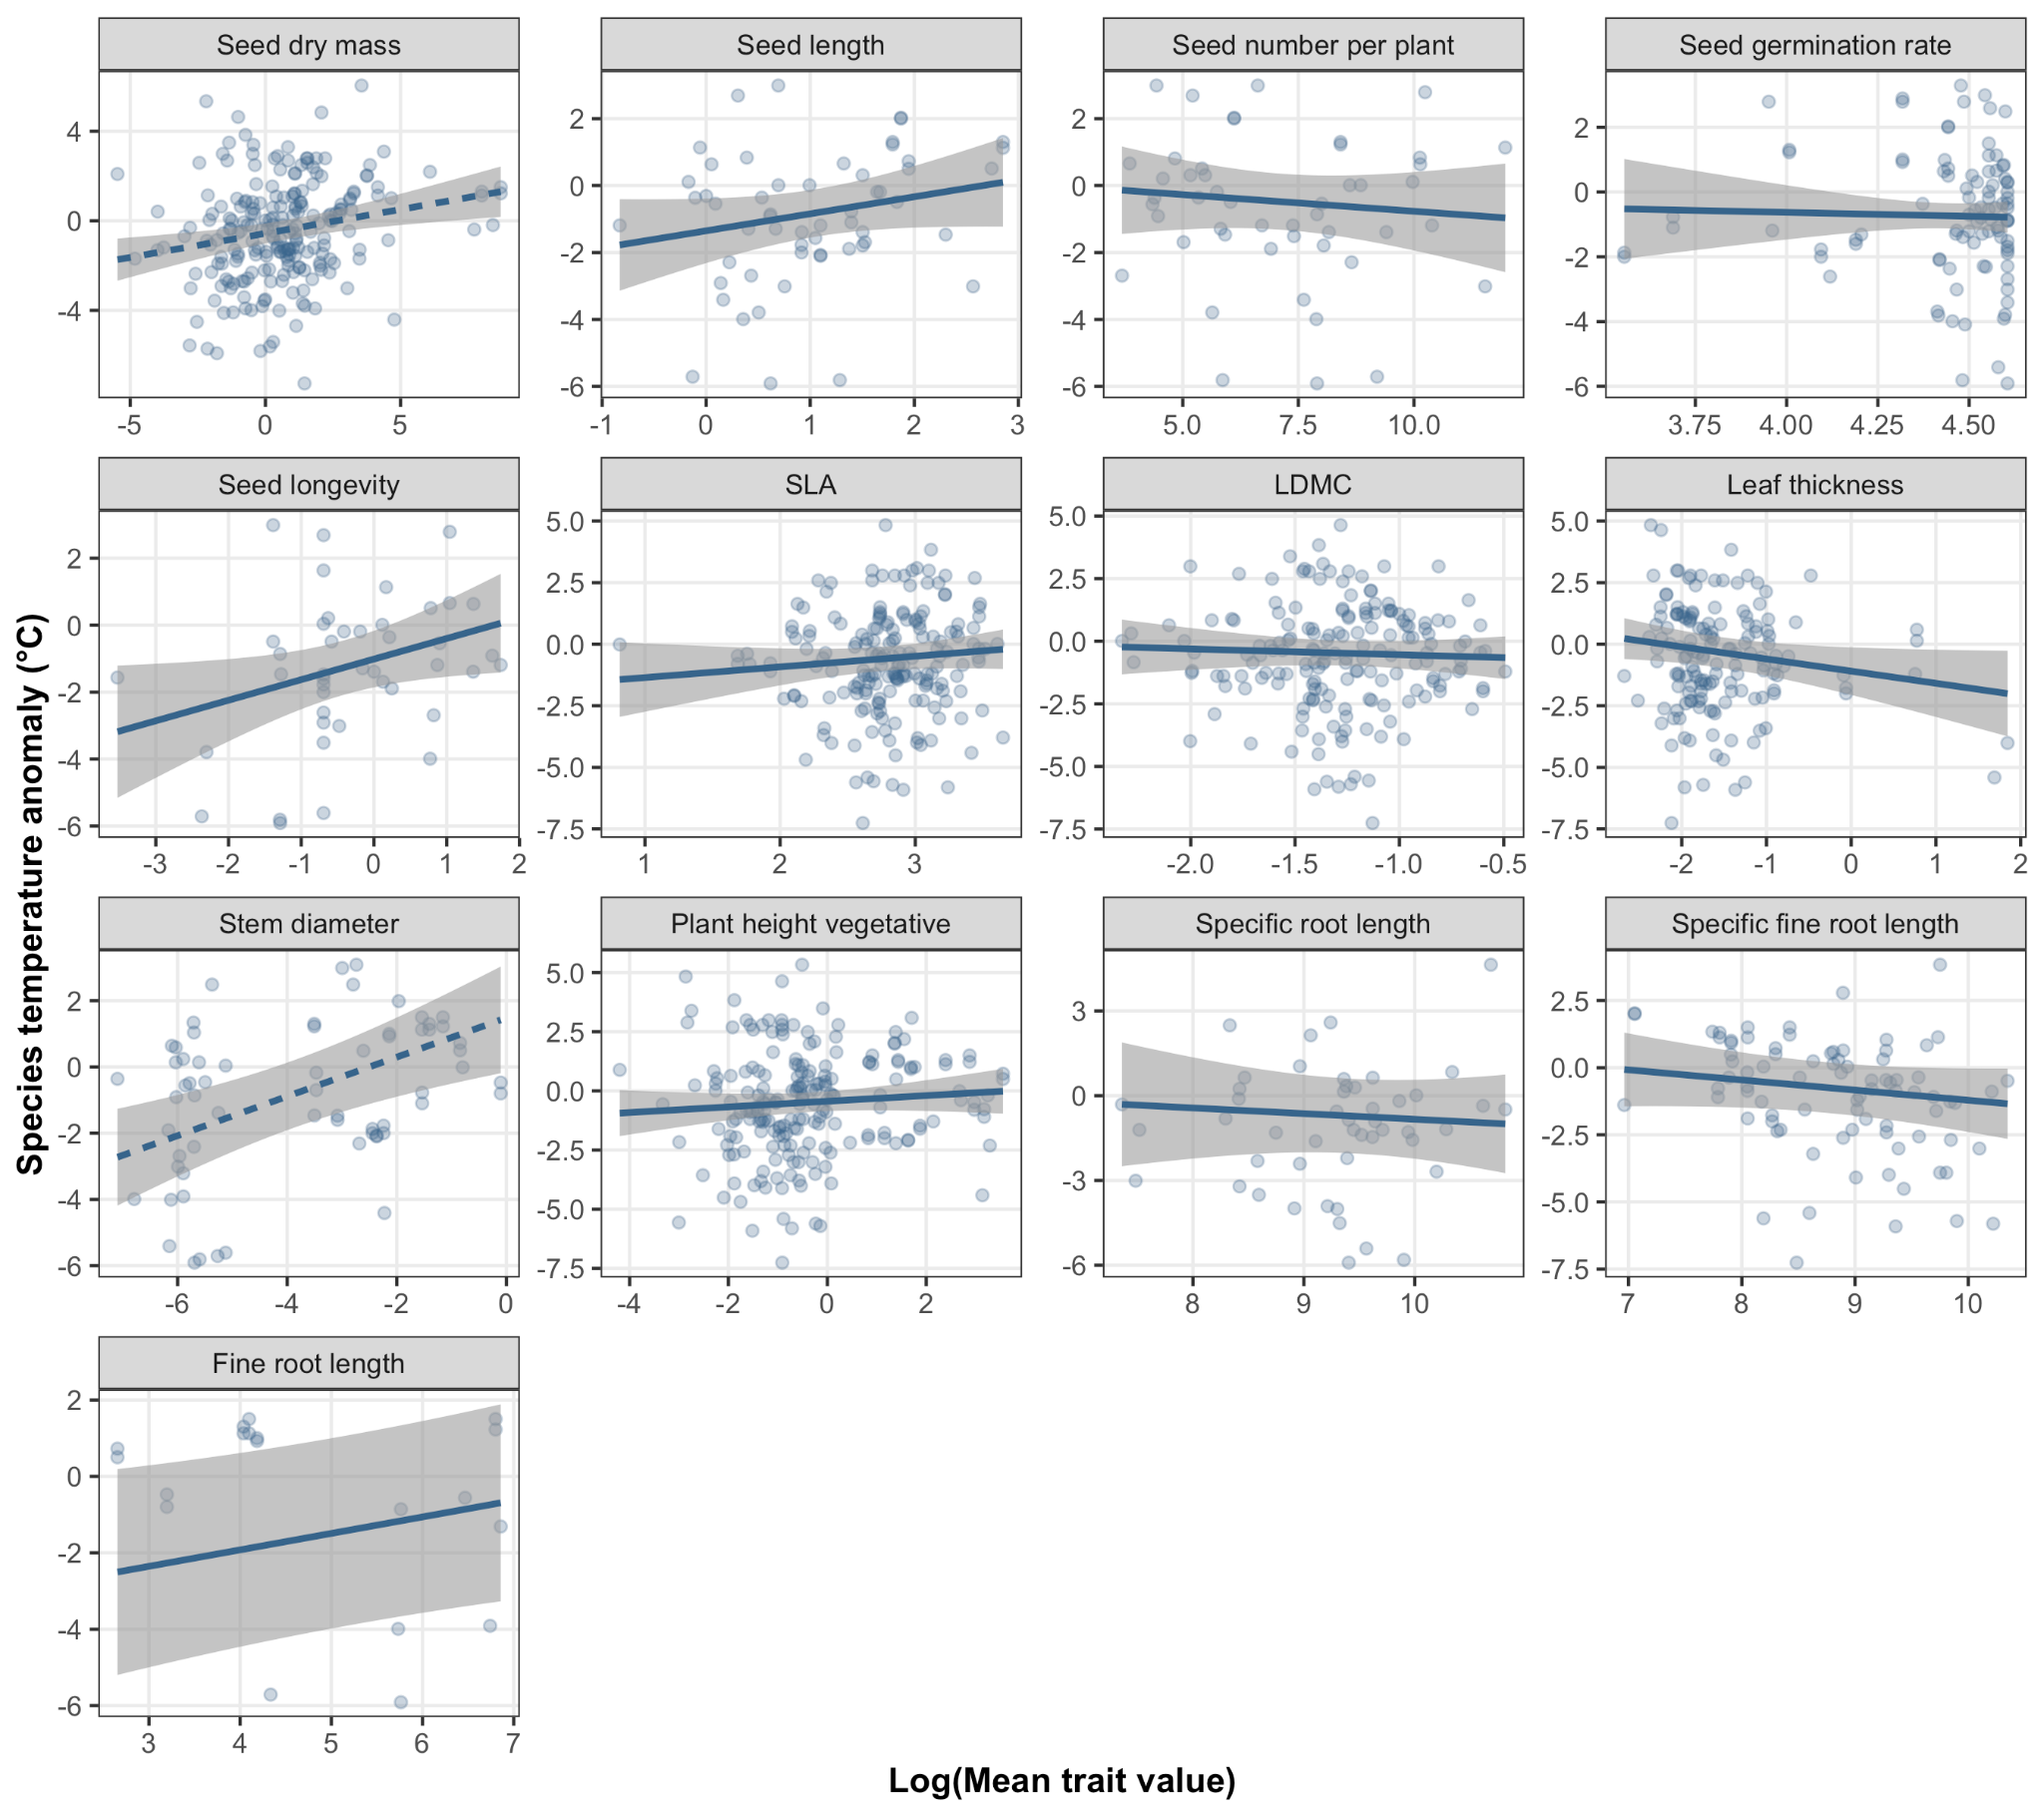


**Figure S10.** Relationships between mean plant trait values (log-transformed) and species temperature anomaly (°C). Each point in each plot represents a value for a single species, whereas the blue line and shaded region represents a fitted linear regression with a 95% confidence interval. Dashed lines represent a significant relationship; only seed dry mass (p = 0.01) and stem diameter (p = 0.01) demonstrated a significant relationship with species’ temperature anomalies.
